1 **Gut-associated bacteria invade the midgut epithelium of *Aedes aegypti* and**  
2 **stimulate innate immunity and suppress Zika virus infection in cells.**

3

4 Shivanand Hegde<sup>1,2</sup>, Denis Voronin<sup>3</sup>, Aitor Casas-Sanchez<sup>1,2</sup> Miguel Saldaña<sup>4</sup>, Alvaro  
5 Acosta-Serrano<sup>1,2</sup>, Vsevolod L. Popov<sup>5</sup>, Ashok K. Chopra<sup>4</sup>, Grant L. Hughes<sup>1,2#</sup>

6

7 <sup>1</sup>Department of Vector Biology, Liverpool School of Tropical Medicine, Liverpool, United  
8 Kingdom

9 <sup>2</sup>Department of Tropical Disease Biology, Liverpool School of Tropical Medicine,  
10 Liverpool, United Kingdom

11 <sup>3</sup>Laboratory of Molecular Parasitology, New York Blood Center, New Yersey, NY, USA

12 <sup>4</sup>Department of Microbiology and Immunology, University of Texas Medical Branch,  
13 Galveston, TX, USA,

14 <sup>5</sup>Department of Pathology, University of Texas Medical Branch, Galveston, TX, USA.

15 #Corresponding author. Grant Hughes: [grant.hughes@lstmed.ac.uk](mailto:grant.hughes@lstmed.ac.uk)

16

17

18

19

20 **Abstract**

21 Microbiota within mosquitoes influence nutrition, immunity, fecundity, and the capacity  
22 to transmit pathogens. Despite their importance, we have a limited understanding of  
23 host-microbiota interactions, especially at the cellular level. It is evident bacterial  
24 symbionts that are localized within the midgut also infect other organs within the  
25 mosquito; however, the route these symbionts take to colonize other tissues is  
26 unknown. Here, utilizing the gentamicin protection assay, we showed that the bacterial  
27 symbionts *Cedecea neteri* and *Serratia mercescens* have the capacity to invade and  
28 reside intracellularly within mosquito cells. Symbiotic bacteria were found within a  
29 vacuole and bacterial replication was observed in mosquito cell by transmission electron  
30 microscopy, indicating bacteria were adapted to the intracellular milieu. Using gene  
31 silencing, we determined that bacteria exploited host factors, including actin and integrin  
32 receptors, to actively invade mosquito cells. As microbiota can affect pathogens within  
33 mosquitoes, we examined the influence of intracellular symbionts on Zika virus (ZIKV)  
34 infection. Mosquito cells harbouring intracellular bacteria had significantly less ZIKV  
35 compared to uninfected cells or cells exposed to non-invasive bacteria. Intracellular  
36 bacteria were observed to substantially upregulate the Toll and IMD innate immune  
37 pathways, providing a possible mechanism mediating these anti-viral effects. Examining  
38 mono-axenically infected mosquitoes using transmission electron and fluorescent  
39 microscopy revealed that bacteria occupied an intracellular niche *in vivo*. Our results  
40 provided evidence that bacteria that associate with the midgut of mosquitoes have  
41 intracellular lifestyles which likely have implications for mosquito biology and pathogen  
42 infection. This study expands our understanding of host-microbiota interactions in

43 mosquitoes, which is important as symbiont microbes are being exploited for vector  
44 control strategies.

45

## 46 **Introduction**

47 Mosquitoes are holometabolous insects with aquatic and terrestrial life stages. Aquatic  
48 stages are continually exposed to microbes in the larval habitat while adults likely  
49 acquire microbiota from the environment after eclosion or when nectar feeding [1-3].  
50 Additionally, environmentally acquired microbes may persist in mosquito tissues  
51 between aquatic and adult life states facilitating transstadial transmission [4-6]. It is  
52 likely that these processes contribute to the considerable variability seen in the adult  
53 microbiome [7-9]. While our understanding of genetic factors that influence host-  
54 microbe interactions and microbiome acquisition are expanding [10, 11], we still have a  
55 poor knowledge of these interactions at the cellular level. Given the importance of the  
56 microbiome on mosquito traits relevant for vectorial capacity and vector competence  
57 [12-15], understanding processes that influence microbiome homeostasis is critical for  
58 developing microbial-based control strategies [16, 17].

59  
60 Bacterial microbiota often resides within several organs in mosquitoes and appears to  
61 be able to migrate between tissues. Several studies have identified bacteria in the gut of  
62 mosquitoes [9, 18-20], which have led to these microbes being commonly referred to as  
63 gut microbes, but many of these bacterial species also colonize other tissues such as  
64 the salivary gland [18, 20-23], reproductive tract [20, 22, 24], or malpighian tubules [4].  
65 While some bacteria are unique to each tissue, several infect multiple tissues within the  
66 mosquito [20, 25], and localization in organs such as the malpighian tubules and  
67 reproductive tissues likely enables transmission between life stages and generations,  
68 respectively. Both *Asaia* and *Serratia* are transferred vertically to progeny after

69 administered to the mosquito in a sugar meal, suggesting symbiotic bacteria have the  
70 capacity to translocate from the midgut to the germline of their host [20, 26-28].  
71 However, mechanisms facilitating their translocation remain elusive. Infection of the  
72 entomopathogenic fungus *Beauveria* of *Anopheles* mosquitoes enabled *Serratia* to escape  
73 the midgut and over replicate in the hemolymph, which was the cause of mortality to the  
74 insect [29]. In *Drosophila*, orally infected *Serratia* localized within the midgut epithelium  
75 [30]. While the epithelial infection was rare in wild type flies, *Serratia* was observed to  
76 localize intracellularly in *imd* knock-out flies, suggesting that host immunity influenced  
77 cellular localization or controlled infections [30]. Although intracellular bacterial  
78 infections have been observed in the midgut of flies [30], cellularity of gut-associated  
79 bacterial infections in mosquitoes and the mechanism facilitating systemic infection of  
80 different tissues is largely unknown. It is plausible that an intracellular lifestyle could  
81 provide a mechanism for transstadial and vertical transmission of bacteria in mosquito  
82 vectors.

83

84 In mammalian systems, bacteria exploit their invasive capability to colonize host tissue  
85 and systemically spread within multicellular organisms [31-33]. Pathogenic bacteria like  
86 *Listeria*, *Salmonella*, *Vibrio*, and *Yersinia* invade host cells to colonize, replicate, and  
87 migrate between cells [32]. While the invasive capacity and mechanisms have been  
88 studied extensively in mammalian cells, *in vitro* investigation in mosquitoes or other  
89 arthropod vectors is lacking. In order to obtain a more complete understanding of the  
90 cellularity of bacteria associated with mosquitoes, we assessed the invasive capability  
91 of two common *Enterobacteriaceae* bacteria in mosquito cells using the gentamicin

92 invasion assay. Using this *in vitro* assay, we characterized the invasive process,  
93 examined the mechanisms by which bacteria invade cells, and assessed the effect of  
94 intracellular bacteria on host immunity and Zika virus (ZIKV) infection. Importantly, using  
95 mono-axenically infected mosquitoes, we found that these bacteria have intracellular  
96 localization in mosquitoes. This work expands our understanding of host-microbe  
97 interactions of gut-associated symbionts in medically relevant mosquito vectors at the  
98 cellular level.

99

## 100 **Results and Discussion**

### 101 **Symbiotic bacteria invade mosquito cells *in vitro***

102 Horizontally acquired bacteria are generally considered to infect the gut lumen, they are  
103 also found in other organs of mosquitoes including the salivary glands, malpighian  
104 tubules, and germline [3, 4, 6, 25, 34]. It remains unknown how these tissues become  
105 infected, but it has been proposed these organs may act as a reservoir to facilitate  
106 transstadial transmission of microbes between mosquito life stages [4, 5]. One  
107 possibility is that gut bacteria exploit their intracellular lifestyle to transition between host  
108 tissues. Therefore, we investigated the capacity of bacteria commonly found in the gut  
109 of mosquitoes to invade mosquito host cells. We isolated two bacteria within the  
110 *Enterobacteriaceae* family, *Serratia marcescens* and *Cedecea neteri*, by conventional  
111 microbiological culturing approaches, and evaluated their invasive capacity using the  
112 gentamicin invasion assay [35].

113

114 While invasion assays are routinely used for pathogenic bacteria in mammalian cells,  
115 the assay is not commonly undertaken with mosquito cells. We performed the  
116 gentamicin invasion assay in Aag2 (*Aedes aegypti*) and Sua5B (*Anopheles gambiae*)  
117 cell lines comparing the invasion of *E. coli* BL21 (DE3) with or without the *Yersinia*  
118 *pseudotuberculosis* (*Yp*) *invasin* (*inv*) gene to invasion of these bacteria in Vero cells  
119 (Monkey Kidney cells). In mammalian systems, heterologous expression of the *Ypinv*  
120 gene facilitates invasion of *E. coli* into cell lines [36-38]. Similar to mammalian systems,  
121 we found that *E. coli* expressing the *Ypinv* gene had significantly increased invasion in  
122 Aag2 cells compared to the non-invasive *E. coli* control (Fig. S1, Unpaired t test,  $p <$   
123  $0.05$ ), while no statistical difference was seen in the Sua5B cell line, likely due to high  
124 variability among replicates ( $p > 0.05$ , Unpaired t test). As expected, *E. coli* expressing  
125 the *inv* gene invaded at significantly higher rates in Vero cells compared to non-invasive  
126 *E. coli* ( $p < 0.05$ , Unpaired t test). While several insect cell lines are naturally phagocytic  
127 [39, 40], our data suggested bacteria were actively invading Aag2 cells, and as such,  
128 we conducted the majority of our experiments with this cell line. Next, we completed the  
129 gentamicin invasion assay with the two gut-associated bacteria from mosquitoes, *C.*  
130 *neteri* and *S. marcescens*, and used *E. coli* with and without the *Ypinv* gene as the  
131 positive and negative controls, respectively. The native symbionts exhibited significantly  
132 higher rates of invasion compared to the *E. coli* expressing *Ypinv* (ANOVA with Tukey's  
133 multiple comparison test,  $p < 0.05$ ) or wildtype *E. coli* (Fig. 1A, ANOVA with Tukey's  
134 multiple comparison test,  $p < 0.01$ ) indicating native gut-associated microbes have the  
135 capacity to invade insect cells and are more adept at this process compared to non-  
136 native *E. coli* expressing mammalian invasive factors.

137

138 To further confirm the results from the gentamicin invasion assay, fluorescent and  
139 transmission electron microscopy (TEM) were performed on cells after invasion. In  
140 order to observe the invaded bacteria in cells using fluorescent microscopy, bacteria  
141 were transformed with a plasmid that expressed the mCherry fluorescent protein [41].  
142 Similar to our quantitative results from the invasion assay, we observed a greater  
143 number of intracellular bacteria in the *Serratia* and *Cedecea* treatments compared to the  
144 *E. coli* negative control (Fig. 1B and Fig. S2). TEM images confirmed both symbionts  
145 isolated from mosquitoes were intracellular, and that bacteria were inside a vacuole  
146 (Fig. 1B, black arrowhead). *E. coli* did not invade cells and was found exclusively  
147 extracellularly. Bacterial encapsulation within a vacuole is a typical signature of invading  
148 bacteria in mammalian systems [42] as well as obligatory intracellular bacteria of insects  
149 such as *Wolbachia* [43]. Taken together, it is evident that both symbionts isolated from  
150 the mosquitoes can invade the host cells *in vitro*.

151

152 Next, we characterized the invasion process of *Cedecea* examining how the multiplicity  
153 of infection (MOI) and incubation time influenced invasion. We noted a linear increase in  
154 the number of intracellular *Cedecea* with increasing multiplicity of infection (MOI) (Fig.  
155 1C, ANOVA with Tukey's multiple comparison test,  $p < 0.05$ ). We then varied the  
156 invasion time and observed bacterial invasion as early as 15 minutes post infection and  
157 invasion increased until 8 hr post infection (Fig. 1D, ANOVA with Tukey's multiple  
158 comparison test,  $p < 0.05$ ). We also examined the invasive ability of *C. neteri* in  
159 different mosquito cells lines. The invasion of this bacterium was similar in both *Ae.*



160 *aegypti* cell lines Aag2 and RML-12 (Fig. 1E, Tukey's multiple comparison test,  $p <$   
161 0.05); however, a greater number of intracellular bacteria were seen in the Sua5B cells.

162

### 163 ***In vitro* intracellular replication and egression of *Cedecea neteri***

164 While undertaking TEM, we captured an image of intracellular replication of *C. neteri*  
165 within mosquito cells (Fig. 2A). Given that bacteria were seen to replicate in the  
166 intracellular environment, we attempted to culture these bacteria in Aag2 cells in a  
167 similar manner to *in vitro* propagation of other intracellular bacteria such as *Wolbachia*  
168 [44]. However, our culturing attempts were unsuccessful as the cell culture media  
169 became contaminated with the inoculated *C. neteri*, despite the extracellular bacteria,  
170 which had not invaded, being killed by gentamicin treatment. We hypothesized that  
171 intracellular *Cedecea* were egressing from the cells and replicating within the cell  
172 culture media.

173

174 We therefore undertook experiments to quantify bacterial egression from the cells. After  
175 allowing *C. neteri* to invade, Aag2 cells were incubated with or without gentamicin and  
176 intracellular and extracellular bacteria were quantified over time. Within the cell,  
177 bacterial numbers remained constant in the presence of gentamicin while in the  
178 absence of antibiotic, there was an an approximate 10-fold increase at eight hours post  
179 infection (Fig. 2B, Unpaired t test,  $p < 0.05$ ). In the cell culture media, we observed a  
180 precipitous increase in bacteria in the absence of antibiotic and recovered little to no  
181 viable bacteria when antibiotics were included in the media (Fig. 2C, Unpaired t test,  
182  $p < 0.05$ ). These data indicated that *C. neteri* was egressing from the cells, replicating in

183 the cell culture media in the absence of antibiotic and then re-invading mosquito cells,  
184 which accounted for the significantly higher titer of intracellular *Cedecea* in the non-  
185 antibiotic treated cells at 8 hours post infection. We found few changes in the total  
186 number of mosquito cells in gentamicin treated or untreated cells, although there was a  
187 subtle but significant reduction in cell number after 8 hours in the treatment without  
188 antibiotics (Fig. S3, Unpaired t test,  $p < 0.0001$ ). However, overall, these data indicated  
189 that bacterial invasion and egression were not overly detrimental to the host cells.

190

### 191 **Host actin and integrin are important for *Cedecea neteri* invasion**

192 The lack of damage to host cells indicates non-lysis mediated exit of bacteria from host  
193 cells. While this would be expected from a mutualistic or commensal gut-associated  
194 bacterium, even some pathogens such as *Mycobacteria*, *Shigella*, and *Chlamydia* use  
195 protrusions and non-lytic exocytosis to exit the host cells without lysis of host cells [45-  
196 48]. The former method involves membrane extensions containing bacteria mediated by  
197 actin polymerization and ultimately these protruded structures are engulfed by  
198 neighboring cells resulting in the transfer of content to adjoining cell [49]. We therefore  
199 hypothesized that *C. neteri* may use actin-based motility as a mechanism to invade and  
200 exit cells.

201

202 To determine the role of the actin cytoskeleton in invasion of bacteria into mosquito  
203 cells, we inhibited the polymerization of actin filaments using cytochalasin D [50]. We  
204 observed a 3-fold reduction in invasion of *Cedecea* in the presence of cytochalasin D  
205 (Fig. 3A, ANOVA with Tukey's multiple comparison test,  $p < 0.001$ ). In contrast, there

206 was no change in intracellular bacteria when cells were treated with SP600125, which  
207 inhibits phagocytosis in mosquito cells [51]. These data suggested that the actin  
208 cytoskeleton is co-opted by *C. neteri* to gain access to the intracellular milieu, and that  
209 phagocytosis played a minimal role in the invasion of bacteria. Similar processes have  
210 been observed in other bacteria-host systems. For example, obligatory intracellular  
211 bacteria such as *Rickettsia*, *Chlamydia*, and *Ehrlichia* hijack the host cell cytoskeletal  
212 and surface proteins to invade, survive and spread within cells [52-54]

213  
214 We then examined whether host receptors facilitate the bacterial entry into mosquito  
215 cells. In mosquitoes, integrins are involved in the engulfment of *E. coli* and malaria  
216 parasites [55], while pathogenic bacteria of humans also exploit these receptors to  
217 invade mammalian host cells [56-58]. Using RNAi, we silenced the alpha and beta  
218 subunit of the integrin receptor and challenged cells with *C. neteri*. After confirming  
219 gene silencing (Fig. S4 A and B), we found significantly fewer intracellular bacteria after  
220 knocking down the beta-integrin (Fig. 3B, ANOVA with Tukey's multiple comparison  
221 test,  $p < 0.05$ ), but no differences in the rate of *Cedecea* invasion when the alpha-  
222 integrin gene was silenced (Fig. 3C, ANOVA with Tukey's multiple comparison test,  $p >$   
223  $0.05$ ). These results indicated that symbiotic *C. neteri* utilized actin filaments and the  
224 beta-integrin receptor to gain entry into the host cells.

225

### 226 **Intracellular *Cedecea* reduces ZIKV replication in mosquito cells**

227 Midgut-associated bacteria can affect pathogens transmitted by mosquitoes by direct or  
228 indirect interactions [59-61]. Therefore, we examined how intracellular *C. neteri* affected

229 viral infection. The symbiont significantly reduced ZIKV loads in cell lines compared to  
230 uninfected controls at both two (Fig. 4A, Unpaired t test,  $p < 0.05$ ) and four (Fig. 4B,  
231 Unpaired t test,  $p < 0.01$ ) days post virus infection (dpvi) (Fig 4A and 4B). Similar to  
232 *Cedecea*, intracellular *Serratia* also significantly reduced ZIKV density by four logs  
233 compared to the uninfected cells at four dpvi (Fig. 4C, ANOVA with Tukey's multiple  
234 comparison test,  $p < 0.05$ ). To determine how the density of bacteria influenced viral  
235 infection, we infected cells at increasing bacterial MOIs before inoculating with virus. At  
236 lower MOIs (1:1 and 1:2), *Cedecea* significantly reduced ZIKV compared to the *E. coli*  
237 (MOI 1:1, Unpaired t test,  $p < 0.01$ , MOI 1:2, Unpaired t test,  $p < 0.0001$ ). However, at  
238 higher MOIs, we noted that both *Cedecea* and *E. coli* reduced ZIKV compared to the  
239 uninfected control. The complete blockage of ZIKV at the higher MOIs suggested that  
240 even non-invasive bacteria can overwhelm viral infection, likely by induction of the  
241 immune effector molecules that are antagonistic to viral infection. Taken together, our  
242 results suggested that members of *Enterobacteriaceae* that commonly infect  
243 mosquitoes have the capacity to interfere with viral pathogens when they are  
244 intracellular.

245

### 246 ***Cedecea* invasion stimulates mosquito immunity**

247 There is a complex interplay between the host innate immune system and microbiota  
248 which maintains microbiome homeostasis [16, 62, 63]. However, invading arboviral  
249 pathogens are also susceptible to these immune pathways [64, 65] thereby providing an  
250 indirect mechanism by which microbiota can interfere with pathogens. We therefore  
251 examined the immune response of mosquito cells challenged with *Cedecea* or *E. coli*

252 comparing these responses to uninfected cells. We quantified the transcription factors  
253 (*rRel1*, *rRel2* and *Stat*) and negative regulators (*Cactus*, *Caspar*, and *PIAS*) of the Toll,  
254 IMD and Jak/Stat immune pathways as well as downstream effector molecules  
255 (*gambicin*, *defensin* and *cecropin*). We found the NF- $\kappa$ B transcription factor *Rel2* was  
256 significantly upregulated by *Cedecea* compared to both the *E. coli* (ANOVA with Tukey's  
257 multiple comparison test,  $p < 0.05$ ) and the uninfected control (ANOVA with Tukey's  
258 multiple comparison test,  $p < 0.01$ ), while a significant difference was only observed for  
259 *Rel1* when the *Cedecea* treatment was compared to the uninfected control (ANOVA  
260 with Tukey's multiple comparison test,  $p < 0.05$ ; Fig 5A). The negative regulator of the  
261 Toll pathway, *Cactus*, was significantly upregulated compared to both the *E. coli* (Fig.  
262 5B, ANOVA with Tukey's multiple comparison test,  $P < 0.05$ ) and uninfected control  
263 (ANOVA with Tukey's multiple comparison test,  $p < 0.01$ ), while no changes were seen  
264 for *Caspar*, the negative regulator of the IMD pathway (Fig. 5B, ANOVA with Tukey's  
265 multiple comparison test,  $p > 0.05$ ). Similarly, no significant changes were observed for  
266 genes in the Jak/Stat pathway. Taken together, these data suggested that the Toll and  
267 IMD pathways were induced by invasion of *Cedecea* into mosquito cells. This is  
268 consistent with previous observations which demonstrated interplay between native  
269 microbiota and mosquito innate immune pathways [61, 66-68]. We observed dramatic  
270 modulation of effector molecules with *Defensin*, *Cecropin* and *Gambicin*, all significantly  
271 enhanced by *Cedecea*. Strikingly, *Cecropin* and *Defensin* expression was nearly 1000-  
272 fold higher (Fig. 5C, Tukey's multiple comparison test,  $p < 0.0001$ ) whereas *Gambicin*  
273 (Fig. 5C, Tukey's multiple comparison test,  $p < 0.001$ ) was elevated 100-fold in cells  
274 inoculated with *Cedecea* compared to the non-infected control. In mosquitoes, these

275 downstream effector molecules are co-regulated by the Toll and IMD pathways [66],  
276 which could explain their prolific enhancement given that intracellular *Cedecea*  
277 stimulated both pathways. As arboviral pathogens also interact with innate immune  
278 pathways, we examined gene expression in cells when co-infected with ZIKV and *C.*  
279 *neteri* focusing on the NF- $\kappa$ B transcription factors and negative regulators of the Toll  
280 and IMD pathways. Patterns of gene expression were similar to the ZIKV uninfected  
281 cells with the exception of *Cactus*, where no significant differences were seen across  
282 bacterial treatments (Fig. 5D and E), suggesting that ZIKV was stimulating the Toll  
283 pathway as the negative regulator was depleted when comparing to ZIKV uninfected  
284 cells.

285

### 286 **Intracellular *Enterobacteriaceae* within the *Aedes* gut epithelium**

287 To determine the capacity of *C. neteri* and *S. marcescens* to invade host cells *in vivo*,  
288 we reared *Ae. aegypti* mosquitoes mono-axenically with either symbiont and analyzed  
289 tissues from larvae and adults by TEM and Confocal Laser Scanning Microscopy  
290 (CLSM). While it was evident there was an accumulation of extracellular *Serratia* in the  
291 lumen of the larval gut (Fig. 6A-B), we also identified bacteria that were associated with  
292 the microvilli. Specifically, we found examples of *Serratia* in the process of transitioning  
293 to or from the midgut epithelial cells. We appreciate our results cannot conclusively  
294 determine if *Serratia* was in the process of invading or egressing from cells, but  
295 regardless, it suggested that the bacterium had been or was soon to be intracellular.  
296 Analysis of gut tissue isolated from adult *Ae. aegypti* mosquitoes infected with *C. neteri*  
297 revealed the presence of bacteria in the cytosol of epithelial cells (Fig. 6B). Closer

298 inspection of these images revealed the bacterium was localized within a vacuole (Fig.  
299 6B, yellow insert), which is a typical signature of intracellular bacteria. Here, *C. neteri*  
300 may be exiting the membrane (Fig. 6B, inserts, white arrow), suggesting these bacteria  
301 can egress from the membrane bound compartment which could facilitate their  
302 replication and spreading.–Egression and re-entry mechanisms are used by several  
303 pathogenic bacteria like *Listeria monocytogenes* and *Shigella flexneri* to escape the  
304 vacuoles to replicative niches [69]. We also confirmed the intracellular localization of *C.*  
305 *neteri* in adult infected guts by CLSM. The orthogonal views of the 3D-reconstructed  
306 tissues locate bacteria on the cells as well as inside cells of the posterior gut,  
307 demonstrated by the co-localization of actin staining with mCherry signal from bacteria  
308 (Fig. 6C, Fig. S5, Supplementary video 1). We also found bacteria inside the cells of the  
309 Malpighian tubules (Fig. 6C, Fig. S5, Supplementary video 2). Altogether, TEM and  
310 CLSM results clearly show bacteria residing inside the host cells *in vivo*.

311  
312 Our data show that *Enterobacteriaceae* that commonly infect the gut of mosquitoes  
313 have the capacity to invade mosquito cells *in vitro* and *in vivo*. To gain access and  
314 persist in these cells, bacteria need to overcome the host immune response and the  
315 peritrophic matrix (PM). The PM, which acts as a physical barrier that separates  
316 epithelial cells from the gut lumen, is expressed constitutively in larvae and after a blood  
317 meal in adults. In a range of arthropods, genes associated with the PM are induced by  
318 bacteria [70] and in turn, the PM plays a pivotal role maintaining gut microbiome  
319 homeostasis, either by protecting bacteria from the innate immune response or  
320 restoring bacterial composition and abundance post blood meal [71]. While another

321 study has identified bacteria associating with the epithelium in *Anopheles* mosquitoes  
322 [72] our finding of intracellular bacteria residing within the midgut epithelium of larvae  
323 and adults indicates the PM is not completely effective at inhibiting microbiota or that  
324 bacteria invade these cells before the PM has established. Alternatively, bacteria may  
325 produce enzymes that degrade the PM in a similar fashion to malaria parasites that  
326 express chitinases [73].

327

328 In *Drosophila*, ingested *Serratia* (Db11) invaded the midgut epithelium in flies with an  
329 impaired IMD pathway, but not wild type flies. However, this infection reduces survival  
330 [30]. Similarly, fungal infection of *Anopheles* mosquitoes enables gut bacteria to  
331 translocate to the hemolymph leading to systemic infection [29]. Similar to the  
332 observations in *Drosophila* [30], we saw intracellular bacteria infrequently in the  
333 mosquito gut, suggesting there were intrinsic factors limiting the systemic infection.  
334 Innate immunity may be responsible for maintaining homeostasis, which would be  
335 consistent with our gene expression data, or alternatively, these mutualistic bacteria  
336 may exploit similar molecular processes as their pathogenic counterparts to overcome  
337 host immune pathways [74]. The intracellular lifestyle of bacteria and their ability to  
338 egress from cells likely facilitates microbial persistence in these holometabolous insects.  
339 Our finding of intracellular bacteria in the malpighian tubules further supports this theory  
340 as bacteria residing within this tissue are known to be transstadially transmitted [4].

341

342 **Conclusions**



343 In conclusion, we have shown through various *in vitro* and *in vivo* data that symbiotic  
344 *Enterobacteriaceae* can invade and replicate intracellularly in mosquito cells. Bacterial  
345 invasion is mediated by host actin filaments and beta-integrin receptors. Intracellular  
346 bacteria dramatically upregulate host IMD and Toll immune pathways and substantially  
347 reduce ZIKV density in cells. These data enhance our understanding of host-microbe  
348 interactions in mosquitoes and point to a possible mechanism by which bacteria, which  
349 are commonly associated with the midgut, could infect other tissues within mosquitoes.

350

### 351 **Material and Methods.**

352 **Ethics statement:** ZIKV, which was originally isolated from an *Ae. aegypti* mosquito  
353 (Chiapas State, Mexico), was obtained from the World Reference Center for Emerging  
354 Viruses and Arboviruses at the University of Texas Medical Branch (Galveston, TX).  
355 Experimental work with the virus was approved by the University of Texas Medical  
356 Branch Institutional Biosafety Committee (reference number 2016055).

357

358 **Isolation of bacteria from mosquitoes:** Lab reared *Ae. albopictus* mosquitoes were  
359 collected and surface sterilized before homogenized in 500  $\mu$ l of 1X PBS. Serial dilution  
360 of homogenates was plated on LB agar plate to obtain isolated colonies. The single  
361 colonies were picked, grown in LB medium before isolating genomic DNA. The 16S  
362 rDNA PCR was performed as described previously [75] and the PCR product was  
363 Sanger sequenced to identify the bacterial species. To further classify the gut-  
364 associated bacteria we completed multilocus sequence typing (MLST) as described

365 previously [11, 76]. The MLST sequences were aligned, concatenated and maximum  
366 likelihood tree was constructed using Seaview [77] (Fig. S6).

367

368 **Bacterial growth and cell culture:** Two bacterial isolates were grown in LB medium at  
369 37°C. The overnight culture was appropriately diluted in Schneider's media (Gibco) to  
370 obtain the MOI of 10 before the infection. The mosquito cell lines were maintained in  
371 their respective medium at 28 °C. The *Ae. aegypti* cell line Aag2 [78] and Sua5B cells  
372 were maintained in *Drosophila* Schneider's medium (Gibco) supplemented with 20%  
373 FBS (Denville Scientific) and 1% penicillin/streptomycin (P/S; 100 Units/mL and 100  
374 µg/mL respectively), RML-12 cells were maintained in Leibovitz' (L15) medium (Gibco)  
375 containing 20% FBS and 10% tryptose phosphate broth. Vero cells (CCL-81) were  
376 purchased from the American Type Culture Collection (Bethesda, MD, USA) and  
377 maintained in DMEM supplemented with 5% FBS and 1% P/S (100 Units/mL and 100  
378 µg/mL respectively) at 37 °C with 5% CO<sub>2</sub>.

379

380 **Gentamicin invasion assay:** The gentamicin invasion assay was performed as  
381 described elsewhere with minor alterations [33]. Aag2 cells were seeded at the density  
382 of  $1 \times 10^5$ /well in 24-well plate 48h prior to infection. On the day of infection, cells were  
383 washed in Schneider's media (Gibco) and infected with 500 µl of bacterial suspension.  
384 After incubating for 1h at 28 °C, bacteria were removed, and cells were washed once  
385 with Schneider's medium and incubated with 200 µg/ml gentamicin for additional 1h to  
386 kill extracellular bacteria. The invaded bacteria were recovered after washing the cells

387 twice with Schneider's media and lysing them in 500  $\mu$ l of 1X PBS containing 0.05%  
388 Triton X-100.

389

390 **Fluorescence and Transmission electron microscopy:** In order to assess the  
391 invasion of symbionts fluorescent microscopy and TEM was performed on the Aag2  
392 cells after allowing bacteria to invade. The bacteria were transformed with mCherry  
393 expressing plasmid pRAM18dRGA-mCherry, which is a modified version of  
394 pRAM18dRGA[MCS] [41]. Aag2 cells were fixed with 1% PFA (Electron Microscopy  
395 Sciences, Hartfield, PA) for 30 min and permeabilized in 1X PBS+0.01 % Triton X-100  
396 (Fischer Scientific) for 20 min following staining with Atto 488 Phalloidin (Sigma) as per  
397 manufacturers recommendations. The cell nuclei were stained with DAPI after washing  
398 the slides in 1X PBS. The slides were stored in Prolong-Antifade (Invitrogen). The  
399 samples were observed using the Revolve-FL epifluorescence microscope (ECHOLAB).  
400 For TEM, insect cells were fixed in fixative (2.5% formaldehyde, 0.1% glutaraldehyde,  
401 0.03% picric acid, 0.03%  $\text{CaCl}_2$  and 0.05 M cacodylate buffer at pH 7.3) and post fixed  
402 in 1% osmium tetroxide for 1 h, stained *en bloc* in 2% aqueous uranyl acetate at 60  $^{\circ}\text{C}$   
403 for 20 min, dehydrated in a graded series of ethanol concentrations, and embedded in  
404 epoxy resin, Poly/Bed 812. Ultrathin sections were cut on a Leica EM UC7 (Leica  
405 Microsystems, Buffalo Grove, IL), placed on Formvar-carbon copper 200 mesh grids,  
406 stained with lead citrate and examined in a Philips (FEI) CM-100 electron microscope at  
407 60 kV. To assess the *in vivo* invasion in mosquito larvae and adults, guts were  
408 dissected after surface sterilization in 1X PBS and then the tissue was fixed in fixative  
409 (2.5% glutaraldehyde and 2% paraformaldehyde buffered with 0.1 M sodium

410 cacodylate) for 2 hours and post fixed in 1% osmium tetroxide for 1 h at room  
411 temperature. Then samples were dehydrated in a graded series of ethanol  
412 concentrations, and embedded in epoxy resin, Epon 812. The sections were prepared  
413 as described above and imaged in a Tecnai Spirit (FEI) transmission electron  
414 microscope at 80 kV. For Confocal Laser Scanning Microscopy, tissue samples were  
415 fixed in 1% PFA in 1X PBS for 30 min, then permeabilized with 0.01% Triton X-100 in 1X  
416 PBS for 20 min before staining with SiR-actin Kit (Spirochrome AG, Switzerland) for 1  
417 hour and DAPI (Applied Biosystems) for 15 min. Then tissue samples were embedded  
418 in 1% low-melting agarose with SlowFade Diamond mounting solution (Molecular  
419 Probes). Samples were imaged and 3D-reconstructed (1.3 mm sections) using a Zeiss  
420 LSM-800 and were analysed in Zen 3.0 (Zeiss) and Fiji (ImageJ).

421  
422 **Intracellular replication of *Cedecea neteri*:** To assess the replication of bacteria  
423 inside the host cells as well as in the medium, the Aag2 cells inoculated with *C. neteri*  
424 were incubated with or without gentamicin for 8h at 28 °C. Every two hours, the  
425 supernatant was collected and serial dilutions were plated on LB agar plate to  
426 enumerate the bacterial quantity in the medium. The cells were washed two times with  
427 Schneider's medium before plating on agar plate.

428  
429 **Host cytoskeleton and Janus Kinase in *Cedecea neteri* invasion:** The gentamicin  
430 invasion assay was performed in the presence of actin and Janus kinase (JAK)  
431 inhibitors. The assay was performed by pre-incubating Aag2 cells in presence of 10 or  
432 20 µg/ml of Cytochalasin D (Sigma) and 30 or 60 µg/ml of Sp600125 (Sigma) for 1 hr.

433 The gentamicin invasion assay was performed as described above with the addition of  
434 each specific drug. A 60 µg/ml of DMSO treatment was used as a control.

435

436 **RNAi mediated integrin gene silencing in Aag2 cells:** In order to assess the role of  
437 host integrin receptors in the invasion of *C. neteri*, the integrin alpha and beta receptors  
438 were depleted using RNAi. dsRNA was designed for AAEL001829 and AAEL014660  
439 using E-RNAi [79] and amplified using primers with flanking T7 promoter sequence  
440 using *Ae. aegypti* cDNA as a template. dsRNA was synthesized using the T7  
441 megascript kit (Ambion). The primers are listed in the Table S1. dsDNA against GFP  
442 was used as control. Aag2 cells were transfected with 0.5 µg of each dsRNA using  
443 Lipofectamine™ RNAiMAX (Life Technologies) 48hrs prior to bacterial infection and the  
444 gentamicin invasion assay.

445

446 **RT-qPCR analysis:** Total RNA was isolated from Aag2 cells and reverse transcribed  
447 using the amfiRivert cDNA synthesis Platinum master mix (GenDepot, Barker, TX, USA)  
448 containing a mixture of oligo(dT)18 and random hexamers. Real-time quantification was  
449 performed in a StepOnePlus instrument (Applied Biosystems, Foster City, CA) in a 10 µl  
450 reaction mixture containing 10-20 ng cDNA template, 1X PowerUp SYBR green master  
451 mix (Applied Biosystems), and 1 µM (each) primer. The analysis was performed using  
452 the threshold cycle ( $\Delta\Delta$  CT) (Livak) method [80]. Four independent biological replicates  
453 were conducted, and all PCRs were performed in duplicate. In order to assess the  
454 expression of innate immune genes, the invasion assay was performed as described  
455 earlier and post 24-hr invasion cells were harvested to isolate RNA, followed by cDNA

456 synthesis and RT-qPCR for specific genes. The ribosomal protein S7 gene [81] was  
457 used for normalization of cDNA templates. Primer sequences are listed in Table S1.

458

459 ***In vitro* vector competence of ZIKV in Aag2 cells:** The assay was performed in order  
460 to assess the how intracellular bacteria modulate ZIKV infection *in vitro*. After the  
461 gentamicin invasion assay with *C. neteri* at an MOI of 1:1, 1:2, 1:5 and 1:10. After 24  
462 hrs, the supernatant was removed, and cells were washed twice with 1x PBS before  
463 infecting with ZIKV (Mex 1-7 strain) [82] at an MOI of 1:0.1. After 4 days, supernatant  
464 was collected and ZIKV was quantified by focus forming assay [82]. The experiment  
465 was repeated three times.

466 **Gnotobiotic rearing and *in vivo* invasion in mosquitoes:** *Ae. aegypti* gnotobiotic  
467 larvae were generated as previously described [83]. To synchronize hatching, sterile  
468 eggs were transferred to a conical flask and placed under a vacuum for 45 min. To  
469 verify sterility, larval water was plated on non-selective LB agar plates. Twenty L1 larvae  
470 were transferred to a T75 tissue culture flask and inoculated with transgenic symbionts  
471 possessing the pRAM18dRGA-mCherry at  $1 \times 10^7$ . Bacterial cultures were quantified with  
472 a spectrophotometer (DeNovix DS-11, DeNovix) and validated by plating and  
473 determining colony forming units. L1 larvae grown without bacteria were used as  
474 contamination control, and these mosquitoes did not reach pupation [83]. To feed  
475 mosquitoes, ground fish food pellets were sterilized by autoclaving and then mixed with  
476 sterile water. 60  $\mu$ l of fish food (1  $\mu$ g/ $\mu$ l) was fed to larvae on alternative days.

477

478 **Acknowledgements.**

479 We would like to thank the UTMB insectary core for providing the lab mosquitoes. GLH  
480 is supported by NIH grants (R21AI138074, R21AI124452 and R21AI129507), the  
481 Wolfson Foundation and Royal Society (RSWF\R1\180013), the John S. Dunn  
482 Foundation Collaborative Research Award, and the Centers for Disease Control and  
483 Prevention (Cooperative Agreement Number U01CK000512). The paper contents are  
484 solely the responsibility of the authors and do not necessarily represent the official  
485 views of the Centers for Disease Control and Prevention or the Department of Health  
486 and Human Services. This work was also supported by a James W. McLaughlin  
487 postdoctoral fellowship at the University of Texas Medical Branch to SH and a NIH T32  
488 fellowship (2T32AI007526) to MAS and Anti-VeC AV/PP0021//1 to AAS. Microscopy  
489 core facility at NYBC was supported by NYBC intramural fund. Confocal imaging  
490 facilities were funded by a Wellcome Trust Multi-User Equipment Grant  
491 (104936/Z/14/Z).

492

493

494 **Author Contributions**

495 SH and GLH designed the experiments. SH, DV, ACS, MAS, and VLP completed the  
496 experiments. SH, DV, VLP, AKC, and GLH undertook analysis. SH, AKC, AAS, and  
497 GLH wrote and edited the manuscript and all authors agreed to the final version. GLH  
498 acquired the funding and supervised the work.

499



500 **Figure legends**

501 **Figure 1. Invasion of symbiotic bacteria into mosquito cells.** The gentamicin  
502 invasion assay was used to examine the invasive capacity of symbiotic  
503 *Enterobacteriaceae* bacteria isolated from *Aedes* mosquitoes (A). Non-invasive *E. coli*  
504 was used as negative control. *E. coli* expressing the *Yersinia inv* (*Ypinv*) gene was used  
505 as a positive control. The assay was repeated twice. Fluorescent and transmission  
506 electron microscopy was used to visualize intracellular bacteria (B). Bacteria expressed  
507 mCherry fluorescent protein (red), actin filaments were stained with Phalloidin (green)  
508 and DNA with DAPI (blue). Arrowheads in the TEM images indicate vacuoles containing  
509 bacteria. Scale bar is 500 nm. Density (C) and time dependent (D) invasion of *C. neteri*  
510 in Aag2 cells. The density dependent invasion assay (C) was replicated twice. The time  
511 dependent invasion assay was done at host cell: bacterial density of 1:10 (N=4). *C.*  
512 *neteri* invasion in *Aedes aegypti* (Aag2 and RML-12 ) and *Anopheles gambiae* (Sua5B)  
513 (E). The assay was repeated twice. Letters indicate significant differences ( $p < 0.05$ )  
514 determined by a One-Way ANOVA with a Tukey's multiple comparison test.

515

516 **Figure 2. Intracellular replication and egression of *C. neteri* in Aag2 cells.** TEM of  
517 Aag2 cells containing invaded *C. neteri* replicating inside Aag2 cell (A). Arrow indicates  
518 the dividing bacterial cell. Bacterial titer in cells (B) or in the cell culture media (C) in the  
519 presence and absence of gentamicin. The significance between the gentamicin and  
520 non-treated samples at different time post invasion was analyzed by Unpaired t test.  
521 Five replicates were used at each time point.

522

523 **Figure 3. The role of host cytoskeletal proteins and receptors in the *C. neteri***  
524 **invasion.** Invasion of *C. neteri* in the presence of inhibitors of actin polymerisation (Cyt  
525 D) and phagocytosis (SP600125 [Sp]) (A). DMSO was used as control to assess its  
526 cytotoxic effect on the cells. *C. neteri* invasion after silencing of the beta- (B) and alpha-  
527 (C) integrins. The experiments were repeated twice. Letters indicate significant  
528 differences ( $p < 0.05$ ) determined by a One-Way ANOVA with a Tukey's multiple  
529 comparison test.

530  
531 **Figure 4. Intracellular bacteria reduces ZIKV titer in *Ae. aegypti* cells.** ZIKV  
532 infection at 2 (A) and 4 (B) days post invasion compared to an uninfected control. ZIKV  
533 infection in *C. neteri* or *S. marcescens* infected cells (C). The effect of bacterial density  
534 on ZIKV infection (D). *C. neteri* and *E. coli* were inoculated onto cells using the  
535 gentamicin invasion assay at increasing MOIs. For the *C. neteri* 1:2, 1:5, and 1:10 and  
536 *E. coli* 1:10 treatments, no ZIKV was recovered from cells. For A, B and D significance  
537 was determined using unpaired t-test, while for C, significance was calculated by one-  
538 way ANNOVA with Tukey's multiple comparison test.

539  
540 **Figure 5. Intracellular *C. neteri* upregulates mosquito Toll and IMD innate immune**  
541 **pathways.** Gene expression analysis of the NF- $\kappa$ B transcriptional activators (A) and the  
542 negative regulators (B) of the Toll, IMD and JAK-STAT pathways as well as  
543 downstream effector molecules (C). Gene expression was measured 24 hr post *C.*  
544 *neteri* invasion in Aag2 cells. Gene expression of the NF- $\kappa$ B transcriptional activators  
545 (D) and the negative regulators (E) in cells co-infected with *C. neteri* or *S. marcescens*

546 and ZIKV. 24 hours post bacterial infection cells were infected with ZIKV. Samples were  
547 collected 4 days post ZIKV infection for qPCR analysis. The experiment was repeated  
548 twice. Letters indicate significant differences ( $p < 0.05$ ) determined by a One-Way  
549 ANOVA with a Tukey's multiple comparison test.

550

551 **Figure 6. Intracellular localization of *C. neteri* and *S. marcescens* in mosquito**

552 **tissues.** TEM micrographs of *S. marcescens* (Sm) accumulated in the gut lumen and

553 associated with the microvilli of the gut epithelium in mono-axenically infected *Ae.*

554 *aegypti* adults (A). Magnified image of bacteria attaching to microvilli (MV) (B), and

555 bacteria in the process of entering or exiting the gut epithelia (purple and green insert).

556 (B) Intracellular *C. neteri* (Cn) in the larval gut mono-axenically infected *Ae. aegypti*.

557 Mitochondria (M) and nucleus (N). Yellow and blue inserts show larger view of bacteria

558 from B. CLSM evidence of the intracellular localization of *C. neteri* in the adult mosquito

559 gut and Malpighian tubules (C). Bright field (left) and maximum intensity projection

560 (right) of tissues 3D-reconstructed from a series of Z-stacks merging mosquito actin

561 (white), mCherry-expressing *C. neteri* (yellow) and DAPI-stained DNA (magenta). Two

562 representative XZ and YZ orthogonal views (OV1-4) of the stacks are shown for each

563 tissue on the sides, and the identity of intracellular bacteria examples is noted with

564 colored squares. On the right, the plots coloured according to the identity of the

565 corresponding bacterium, show the co-localization of the actin signal (gray) with the

566 mCherry bacteria (yellow). Scale bars are 50  $\mu\text{m}$ .

567

568

569 **Supplementary figure legends**

570 **Figure S1. Gentamicin invasion assay in different cell lines.** Invasion of *E. coli* and  
571 *E. coli* BL21 expressing the *Yersinia invasion* gene (*Ypinv*) in different cell lines. The  
572 assay was done in Aag2 (*Aedes aegypti*), Sua5B (*Anopheles gambiae*) and Vero  
573 (Monkey kidney cells). The assay was done twice. The statistical significance was  
574 determined using an Unpaired t-test.

575  
576 **Figure S2. Flourscent microscopy of bacteria in Aag2 cells.** Merged and separate  
577 channels – blue (DAPI), green (actin filaments stained with Phalloidin), red (bacteria  
578 expressing mCherry). Scale bars are 70  $\mu\text{m}$ .

579  
580 **Figure S3. Effect of intracellular bacteria on the cell viability.** Aag2 cell numbers at  
581 different times post invasion with *C. neteri*. Cells were supplement with gentamicin (200  
582  $\mu\text{g/ml}$ ) or cultured in the absence of antibiotic.

583  
584 **Figure S4. Validation of gene silencing in cells.** RT-qPCR analysis of beta (A) and  
585 alpha (B) integrin gene expression 24 hours post transfection of dsRNA. dsRNAs  
586 targetting GFP were used as the negative control. The experiment was repeated twice.  
587 The statistical significance was determined using an Unpaired t-test.

588  
589 **Figure S5. CLSM analyses of infected adult gut and Malpighian tubule.** Maximum  
590 intensity projection of tissues 3D-reconstructed from a series of Z-stacks merging  
591 mosquito actin (white), mCherry-expressing *Cedecea* (yellow) and DAPI-stained DNA

592 (magenta). Several XZ and YZ orthogonal views (OV) of the stacks are shown for each  
593 tissue on the sides. Scale bars are 50  $\mu\text{m}$ .

594

595 **Figure S6.** Multilocus sequence analysis according to [76] indicates isolate to be  
596 members of the *S. marcescens* species; the MLST genes were amplified from bacteria  
597 isolated from *Aedes albopictus* mosquitoes (highlighted in blue).

598

599 **Supplementary table legends.**

600 **Table S1.** Primer sequences used in this study

601

602 **Supplementary video legends.**

603 **Video S1.** Series of Z-stacks of an adult infected gut by CLSM.

604

605 **Video S2.** Series of Z-stacks of an adult infected Malpighian tubule by CLSM.

606

607 **Reference:**

608

609 1. Duguma D, Hall MW, Smartt CT, Neufeld JD. Effects of Organic Amendments on  
610 Microbiota Associated with the *Culex nigripalpus* Mosquito Vector of the Saint Louis  
611 Encephalitis and West Nile Viruses. *mSphere*. 2017;2(1). Epub 2017/02/09. doi:  
612 10.1128/mSphere.00387-16.

613 2. Dada N, Jumas-Bilak E, Manguin S, Seidu R, Stenström T-A, Overgaard HJ.  
614 Comparative assessment of the bacterial communities associated with *Aedes aegypti*  
615 larvae and water from domestic water storage containers. *Parasites & Vectors*.  
616 2014;7(1):391. doi: 10.1186/1756-3305-7-391.

617 3. Gusmao DS, Santos AV, Marini DC, Russo Ede S, Peixoto AM, Bacci Junior M,  
618 et al. First isolation of microorganisms from the gut diverticulum of *Aedes aegypti*  
619 (Diptera: Culicidae): new perspectives for an insect-bacteria association. *Mem Inst*  
620 *Oswaldo Cruz*. 2007;102(8):919-24. Epub 2008/01/23. doi: 10.1590/s0074-  
621 02762007000800005.

622 4. Chavshin AR, Oshaghi MA, Vatandoost H, Yakhchali B, Zarenejad F, Terenius  
623 O. Malpighian tubules are important determinants of *Pseudomonas transstadial*  
624 transmission and longtime persistence in *Anopheles stephensi*. *Parasites & Vectors*.  
625 2015;8(1):36. doi: 10.1186/s13071-015-0635-6.

626 5. Chen S, Bagdasarian M, Walker ED. *Elizabethkingia anophelis*: Molecular  
627 Manipulation and Interactions with Mosquito Hosts. *Applied and Environmental*  
628 *Microbiology*. 2015;81(6):2233. doi: 10.1128/AEM.03733-14.

- 629 6. Alonso DP, Mancini MV, Damiani C, Cappelli A, Ricci I, Alvarez MVN, et al.  
630 Genome Reduction in the Mosquito Symbiont *Asaia*. *Genome Biol Evol.* 2019;11(1):1-  
631 10. Epub 2018/11/27. doi: 10.1093/gbe/evy255.
- 632 7. Duguma D, Hall MW, Smartt CT, Debboun M, Neufeld JD. Microbiota variations  
633 in *Culex nigripalpus* disease vector mosquito of West Nile virus and Saint Louis  
634 Encephalitis from different geographic origins. *PeerJ.* 2019;6:e6168. Epub 2019/01/16.  
635 doi: 10.7717/peerj.6168.
- 636 8. Osei-Poku J, Mbogo CM, Palmer WJ, Jiggins FM. Deep sequencing reveals  
637 extensive variation in the gut microbiota of wild mosquitoes from Kenya. *Molecular*  
638 *Ecology.* 2012;21(20):5138-50. doi: 10.1111/j.1365-294X.2012.05759.x.
- 639 9. Muturi EJ, Ramirez JL, Rooney AP, Kim C-H. Comparative analysis of gut  
640 microbiota of mosquito communities in central Illinois. *PLoS Neglected Tropical*  
641 *Diseases.* 2017;11(2):e0005377-18. doi: 10.1371/journal.pntd.0005377.
- 642 10. Pei D, Jiang J, Yu W, Kukutla P, Uentillie A, Xu J. The *waaL* gene mutation  
643 compromised the inhabitation of *Enterobacter sp. Ag1* in the mosquito gut environment.  
644 *Parasites & Vectors.* 2015:1-10. doi: 10.1186/s13071-015-1049-1.
- 645 11. Hegde S, Nilyanimit P, Kozlova E, Anderson ER, Narra HP, Sahni SK, et al.  
646 CRISPR/Cas9-mediated gene deletion of the *ompA* gene in symbiotic *Cedecea neteri*  
647 impairs biofilm formation and reduces gut colonization of *Aedes aegypti* mosquitoes.  
648 *PLOS Neglected Tropical Diseases.* 2019;13(12):e0007883. doi:  
649 10.1371/journal.pntd.0007883.

- 650 12. Guegan M, Zouache K, Demichel C, Minard G, Tran Van V, Potier P, et al. The  
651 mosquito holobiont: fresh insight into mosquito-microbiota interactions. *Microbiome*.  
652 2018;6(1):49. Epub 2018/03/21. doi: 10.1186/s40168-018-0435-2.
- 653 13. Brady OJ, Godfray HC, Tatem AJ, Gething PW, Cohen JM, McKenzie FE, et al.  
654 Vectorial capacity and vector control: reconsidering sensitivity to parameters for malaria  
655 elimination. *Trans R Soc Trop Med Hyg*. 2016;110(2):107-17. Epub 2016/01/30. doi:  
656 10.1093/trstmh/trv113.
- 657 14. Hegde S, Rasgon JL, Hughes GL. The microbiome modulates arbovirus  
658 transmission in mosquitoes. *Current Opinion in Virology*. 2015;15:97-102. doi:  
659 10.1016/j.coviro.2015.08.011.
- 660 15. Caragata EP, Tikhe CV, Dimopoulos G. Curious entanglements: interactions  
661 between mosquitoes, their microbiota, and arboviruses. *Current Opinion in Virology*.  
662 2019;37:26-36. doi: <https://doi.org/10.1016/j.coviro.2019.05.005>.
- 663 16. Saldaña MA, Hegde S, Hughes GL. Microbial control of arthropod-borne disease.  
664 *Memórias do Instituto Oswaldo Cruz*. 2017;112(2):81-93. doi: 10.1590/0074-  
665 02760160373.
- 666 17. Ricci I, Damiani C, Capone A, DeFreece C, Rossi P, Favia G.  
667 Mosquito/microbiota interactions: from complex relationships to biotechnological  
668 perspectives. *Current Opinion in Microbiology*. 2012;15(3):278-84. doi:  
669 10.1016/j.mib.2012.03.004.
- 670 18. Berhanu A, Abera A, Nega D, Mekasha S, Fentaw S, Assefa A, et al. Isolation  
671 and identification of microflora from the midgut and salivary glands of Anopheles



- 672 species in malaria endemic areas of Ethiopia. *BMC Microbiol.* 2019;19(1):85. Epub  
673 2019/05/01. doi: 10.1186/s12866-019-1456-0.
- 674 19. Dickson LB, Ghozlane A, Volant S, Bouchier C, Ma L, Vega-Rua A, et al. Diverse  
675 laboratory colonies of *Aedes aegypti* harbor the same adult midgut bacterial  
676 microbiome. *Parasites & Vectors.* 2018;11(1):207. doi: 10.1186/s13071-018-  
677 2780-1.
- 678 20. Damiani C, Ricci I, Crotti E, Rossi P, Rizzi A, Scuppa P, et al. Paternal  
679 transmission of symbiotic bacteria in malaria vectors. *Current biology : CB.*  
680 2008;18(23):R1087-8. doi: 10.1016/j.cub.2008.10.040.
- 681 21. Sharma P, Sharma S, Maurya RK, Das De T, Thomas T, Lata S, et al. Salivary  
682 glands harbor more diverse microbial communities than gut in *Anopheles culicifacies*.  
683 *Parasites & Vectors.* 2014;7(1):235. doi: 10.1186/1756-3305-7-235.
- 684 22. Gimonneau G, Tchioffo MT, Abate L, Boissière A, Awono-Ambene PH, Nsango  
685 SE, et al. Composition of *Anopheles coluzzii* and *Anopheles gambiae* microbiota from  
686 larval to adult stages. *Infection, genetics and evolution : journal of molecular  
687 epidemiology and evolutionary genetics in infectious diseases.* 2014;28:715-24. doi:  
688 10.1016/j.meegid.2014.09.029.
- 689 23. Mancini MV, Damiani C, Accoti A, Tallarita M, Nunzi E, Cappelli A, et al.  
690 Estimating bacteria diversity in different organs of nine species of mosquito by next  
691 generation sequencing. *BMC Microbiol.* 2018;18(1):126. Epub 2018/10/06. doi:  
692 10.1186/s12866-018-1266-9.
- 693 24. Segata N, Baldini F, Pompon J, Garrett WS, Truong DT, Dabiré RK, et al. The  
694 reproductive tracts of two malaria vectors are populated by a core microbiome and by

- 695 gender- and swarm-enriched microbial biomarkers. *Scientific Reports*. 2016;6:24207.  
696 doi: 10.1038/srep24207.
- 697 25. Tchioffo MT, Boissiere A, Abate L, Nsango SE, Bayibeki AN, Awono-Ambene  
698 PH, et al. Dynamics of Bacterial Community Composition in the Malaria Mosquito's  
699 Epithelia. *Front Microbiol*. 2015;6:1500. Epub 2016/01/19. doi:  
700 10.3389/fmicb.2015.01500.
- 701 26. Koosha M, Vatandoost H, Karimian F, Choubdar N, Oshaghi MA. Delivery of a  
702 Genetically Marked *Serratia* AS1 to Medically Important Arthropods for Use in RNAi and  
703 Paratransgenic Control Strategies. *Microb Ecol*. 2018. Epub 2018/11/22. doi:  
704 10.1007/s00248-018-1289-7.
- 705 27. Wang S, Dos-Santos ALA, Huang W, Liu KC, Oshaghi MA, Wei G, et al. Driving  
706 mosquito refractoriness to *Plasmodium falciparum* with engineered symbiotic bacteria.  
707 *Science (New York, NY)*. 2017;357(6358):1399-402. doi: 10.1126/science.aan5478.
- 708 28. Damiani C, Ricci I, Crotti E, Rossi P, Rizzi A, Scuppa P, et al. Mosquito-Bacteria  
709 Symbiosis: The Case of *Anopheles gambiae* and *Asaia*. *Microb Ecol*. 2010;60(3):644-  
710 54. doi: 10.1007/s00248-010-9704-8.
- 711 29. Wei G, Lai Y, Wang G, Chen H, Li F, Wang S. Insect pathogenic fungus interacts  
712 with the gut microbiota to accelerate mosquito mortality. *Proceedings of the National*  
713 *Academy of Sciences of the United States of America*. 2017;114(23):5994-9. doi:  
714 10.1073/pnas.1703546114.
- 715 30. Nehme NT, Liégeois S, Kele B, Giammarinaro P, Pradel E, Hoffmann JA, et al. A  
716 model of bacterial intestinal infections in *Drosophila melanogaster*. 2007;3(11):e173.  
717 doi: 10.1371/journal.ppat.0030173.

- 718 31. Czuczman MA, Fattouh R, van Rijn JM, Canadien V, Osborne S, Muise AM, et  
719 al. *Listeria monocytogenes* exploits efferocytosis to promote cell-to-cell spread. *Nature*.  
720 2014;509(7499):230-4. Epub 2014/04/18. doi: 10.1038/nature13168.
- 721 32. Ribet D, Cossart P. How bacterial pathogens colonize their hosts and invade  
722 deeper tissues. *Microbes and infection*. 2015;17(3):173-83. doi:  
723 10.1016/j.micinf.2015.01.004.
- 724 33. Hegde S, Hegde S, Spargser J, Brunthaler R, Rosengarten R, Chopra-  
725 Dewasthaly R. In vitro and in vivo cell invasion and systemic spreading of *Mycoplasma*  
726 *agalactiae* in the sheep infection model. *International journal of medical microbiology :*  
727 *IJMM*. 2014;304(8):1024-31. doi: 10.1016/j.ijmm.2014.07.011.
- 728 34. Tchioffo MT, Abate L, Boissière A, Nsango SE, Gimonneau G, Berry A, et al. An  
729 epidemiologically successful *Escherichia coli* sequence type modulates *Plasmodium*  
730 *falciparum* infection in the mosquito midgut. *Infection, genetics and evolution : journal of*  
731 *molecular epidemiology and evolutionary genetics in infectious diseases*. 2016;43:22-  
732 30. doi: 10.1016/j.meegid.2016.05.002.
- 733 35. Elsinghorst EA. Measurement of invasion by gentamicin resistance. *Methods*  
734 *Enzymol*. 1994;236:405-20. Epub 1994/01/01.
- 735 36. Isberg RR, Falkow S. A single genetic locus encoded by *Yersinia*  
736 *pseudotuberculosis* permits invasion of cultured animal cells by *Escherichia coli* K-12.  
737 *Nature*. 1985;317(6034):262-4.
- 738 37. Isberg RR, Voorhis DL, Falkow S. Identification of invasins: a protein that allows  
739 enteric bacteria to penetrate cultured mammalian cells. *Cell*. 1987;50(5):769-78. Epub  
740 1987/08/28. doi: 10.1016/0092-8674(87)90335-7.

- 741 38. Dersch P, Isberg RR. A region of the *Yersinia pseudotuberculosis* invasin protein  
742 enhances integrin-mediated uptake into mammalian cells and promotes self-  
743 association. *The EMBO Journal*. 1999;18(5):1199-213. doi: 10.1093/emboj/18.5.1199.
- 744 39. Trujillo-Ocampo A, Cazares-Raga FE, Del Angel RM, Medina-Ramirez F,  
745 Santos-Argumedeo L, Rodriguez MH, et al. Participation of 14-3-3epsilon and 14-3-3zeta  
746 proteins in the phagocytosis, component of cellular immune response, in *Aedes*  
747 mosquito cell lines. *Parasit Vectors*. 2017;10(1):362. Epub 2017/08/03. doi:  
748 10.1186/s13071-017-2267-5.
- 749 40. Dimopoulos G, Müller HM, Levashina EA, Kafatos FC. Innate immune defense  
750 against malaria infection in the mosquito. *Current Opinion in Immunology*.  
751 2001;13(1):79-88.
- 752 41. Hegde S, Khanipov K, Albayrak L, Golovko G, Pimenova M, Saldaña MA, et al.  
753 Microbiome interaction networks and community structure from laboratory-reared and  
754 field-collected *Aedes aegypti*, *Aedes albopictus*, and *Culex quinquefasciatus* mosquito  
755 vectors. *Frontiers in Microbiology*. 2018;9:715. doi: 10.3389/fmicb.2018.02160.
- 756 42. Gupta L, Molina-Cruz A, Kumar S, Rodrigues J, Dixit R, Zamora RE, et al. The  
757 STAT pathway mediates late-phase immunity against *Plasmodium* in the mosquito  
758 *Anopheles gambiae*. *Cell Host & Microbe*. 2009;5(5):498-507. doi:  
759 10.1016/j.chom.2009.04.003.
- 760 43. Wright JD, Barr AR. The ultrastructure and symbiotic relationships of *Wolbachia*  
761 of mosquitoes of the *Aedes scutellaris* group. *Journal of Ultrastructure Research*.  
762 1980;72(1):52-64. doi: [https://doi.org/10.1016/S0022-5320\(80\)90135-5](https://doi.org/10.1016/S0022-5320(80)90135-5).

- 763 44. Fattouh N, Cazevieille C, Landmann F. Wolbachia endosymbionts subvert the  
764 endoplasmic reticulum to acquire host membranes without triggering ER stress. PLOS  
765 Neglected Tropical Diseases. 2019;13(3):e0007218. doi: 10.1371/journal.pntd.0007218.
- 766 45. Traven A, Naderer T. Microbial egress: a hitchhiker guide to freedom. PLOS  
767 Pathogens. 2014;10(7):e1004201. doi: 10.1371/journal.ppat.1004201.
- 768 46. Flieger A, Frischknecht F, Hacker G, Hornef MW, Pradel G. Pathways of host cell  
769 exit by intracellular pathogens. Microb Cell. 2018;5(12):525-44. Epub 2018/12/12. doi:  
770 10.15698/mic2018.12.659.
- 771 47. Haglund CM, Welch MD. Pathogens and polymers: microbe-host interactions  
772 illuminate the cytoskeleton. J Cell Biol. 2011;195(1):7-17. Epub 2011/10/05. doi:  
773 10.1083/jcb.201103148.
- 774 48. Hybiske K, Stephens R. Cellular Exit Strategies of Intracellular Bacteria.  
775 Microbiol Spectr. 2015;3(6). Epub 2016/06/24. doi: 10.1128/microbiolspec.VMBF-0002-  
776 2014.
- 777 49. Fukumatsu M, Ogawa M, Arakawa S, Suzuki M, Nakayama K, Shimizu S, et al.  
778 Shigella targets epithelial tricellular junctions and uses a noncanonical clathrin-  
779 dependent endocytic pathway to spread between cells. Cell Host & Microbe.  
780 2012;11(4):325-36. doi: 10.1016/j.chom.2012.03.001.
- 781 50. Casella JF, Flanagan MD, Lin S. Cytochalasin D inhibits actin polymerization and  
782 induces depolymerization of actin filaments formed during platelet shape change.  
783 Nature. 1981;293(5830):302-5. Epub 1981/09/24. doi: 10.1038/293302a0.
- 784 51. Mizutani T, Kobayashi M, Eshita Y, Shirato K, Kimura T, Ako Y, et al.  
785 Involvement of the JNK-like protein of the Aedes albopictus mosquito cell line, C6/36, in

- 786 phagocytosis, endocytosis and infection of West Nile virus. *Insect Mol Biol.* 2003;12.  
787 doi: 10.1046/j.1365-2583.2003.00435.x.
- 788 52. Lin M, Kikuchi T, Brewer HM, Norbeck AD, Rikihisa Y. Global Proteomic Analysis  
789 of Two Tick-Borne Emerging Zoonotic Agents: *Anaplasma Phagocytophilum* and  
790 *Ehrlichia Chaffeensis*. *Frontiers in Microbiology.* 2011;2. doi:  
791 10.3389/fmicb.2011.00024.
- 792 53. Martinez JJ, Cossart P. Early signaling events involved in the entry of *Rickettsia*  
793 *conorii* into mammalian cells. *Journal Of Cell Science.* 2004;117(Pt 21):5097-106. doi:  
794 10.1242/jcs.01382.
- 795 54. Wesolowski J, Paumet F. Taking control: reorganization of the host cytoskeleton  
796 by *Chlamydia*. *F1000Research.* 2017;6:2058. doi: 10.12688/f1000research.12316.1.
- 797 55. Moita L, Vriend G, Mahairaki V, Louis C, Kafatos F. Integrins of *Anopheles*  
798 *gambiae* and a putative role of a new  $\beta$  integrin, BINT2, in phagocytosis of *E. coli*. *Insect*  
799 *Biochemistry and Molecular Biology.* 2006;36(4):282-90. doi:  
800 10.1016/j.ibmb.2006.01.004.
- 801 56. Eto DS, Jones TA, Sundsbak JL, Mulvey MA. Integrin-mediated host cell  
802 invasion by type 1-piliated uropathogenic *Escherichia coli*. *PLOS Pathogens.*  
803 2007;3(7):e100. doi: 10.1371/journal.ppat.0030100.
- 804 57. Wu J, Weening EH, Faske JB, Höök M, Skare JT. Invasion of Eukaryotic Cells by  
805 *Borrelia burgdorferi* Requires  $\beta$  1 Integrins and Src Kinase Activity. *Infection and*  
806 *Immunity.* 2011;79(3):1338-48. doi: 10.1128/IAI.01188-10.

- 807 58. Gillenius E, Urban CF. The adhesive protein invasin of *Yersinia*  
808 *pseudotuberculosis* induces neutrophil extracellular traps via  $\beta$ 1 integrins. *Microbes and*  
809 *infection*. 2015;17(5):327-36. doi: 10.1016/j.micinf.2014.12.014.
- 810 59. Miesen P, van Rij RP. Crossing the Mucosal Barrier: A Commensal Bacterium  
811 Gives Dengue Virus a Leg-Up in the Mosquito Midgut. *Cell Host Microbe*. 2019;25(1):1-  
812 2. Epub 2019/01/11. doi: 10.1016/j.chom.2018.12.009.
- 813 60. Coatsworth H, Caicedo PA, Van Rossum T, Ocampo CB, Lowenberger C. The  
814 Composition of Midgut Bacteria in *Aedes aegypti* (Diptera: Culicidae) That Are Naturally  
815 Susceptible or Refractory to Dengue Viruses. *Journal of Insect Science*. 2018;18(6).  
816 doi: 10.1093/jisesa/iey118.
- 817 61. Hegde S, Hegde S, Hegde S, Zimmermann M, Flöck M, Spargser J, et al.  
818 Simultaneous Identification of Potential Pathogenicity Factors of *Mycoplasma agalactiae*  
819 in the Natural Ovine Host by Negative Selection. *Infection and Immunity*.  
820 2015;83(7):2751-61. doi: 10.1128/IAI.00403-15.
- 821 62. Broderick NA. Friend, foe or food? Recognition and the role of antimicrobial  
822 peptides in gut immunity and *Drosophila*-microbe interactions. *Philosophical*  
823 *transactions of the Royal Society of London Series B, Biological sciences*.  
824 2016;371(1695):20150295. doi: 10.1098/rstb.2015.0295.
- 825 63. Buchon N, Broderick NA, Poidevin M, Pradervand S, Lemaitre B. *Drosophila*  
826 intestinal response to bacterial infection: activation of host defense and stem cell  
827 proliferation. *Cell Host & Microbe*. 2009;5(2):200-11. doi:  
828 10.1016/j.chom.2009.01.003.

- 829 64. Cheng G, Liu Y, Wang P, Xiao X. Mosquito Defense Strategies against Viral  
830 Infection. *Trends Parasitol.* 2016;32(3):177-86. Epub 2015/12/03. doi:  
831 10.1016/j.pt.2015.09.009.
- 832 65. Fragkoudis R, Attarzadeh-Yazdi G, Nash AA, Fazakerley JK, Kohl A. Advances  
833 in dissecting mosquito innate immune responses to arbovirus infection. *The Journal of*  
834 *general virology.* 2009;90(Pt 9):2061-72. doi: 10.1099/vir.0.013201-0.
- 835 66. Zhang X, Aksoy E, Girke T, Raikhel AS, Karginov FV. Transcriptome-wide  
836 microRNA and target dynamics in the fat body during the gonadotrophic cycle of *Aedes*  
837 *aegypti.* *Proceedings of the National Academy of Sciences of the United States of*  
838 *America.* 2017;114(10):E1895-E903. doi: 10.1073/pnas.1701474114.
- 839 67. Barletta AB, Nascimento-Silva MC, Talyuli OA, Oliveira JH, Pereira LO, Oliveira  
840 PL, et al. Microbiota activates IMD pathway and limits Sindbis infection in *Aedes*  
841 *aegypti.* *Parasit Vectors.* 2017;10(1):103. Epub 2017/02/25. doi: 10.1186/s13071-017-  
842 2040-9.
- 843 68. Kumar A, Srivastava P, Sirisena P, Dubey SK, Kumar R, Shrinet J, et al.  
844 Mosquito Innate Immunity. *Insects.* 2018;9(3). Epub 2018/08/12. doi:  
845 10.3390/insects9030095.
- 846 69. Friedrich N, Hagedorn M, Soldati-Favre D, Soldati T. Prison break: pathogens  
847 strategies to egress from host cells. *Microbiol Mol Biol Rev.* 2012;76(4):707-20. doi:  
848 10.1128/MMBR.00024-12.
- 849 70. Narasimhan S, Rajeevan N, Liu L, Zhao YO, Heisig J, Pan J, et al. Gut  
850 Microbiota of the Tick Vector *Ixodes scapularis* Modulate Colonization of the Lyme



- 851 Disease Spirochete. Cell Host & Microbe. 2014;15(1):58-71. doi:  
852 10.1016/j.chom.2013.12.001.
- 853 71. Rodgers FH, Gendrin M, Wyer CAS, Christophides GK. Microbiota-induced  
854 peritrophic matrix regulates midgut homeostasis and prevents systemic infection of  
855 malaria vector mosquitoes. PLOS Pathogens. 2017;13(5):e1006391. doi:  
856 10.1371/journal.ppat.1006391.
- 857 72. Gusmão DS, Santos AV, Marini DC, Bacci Jr M, Berbert-Molina MA, Lemos FJA.  
858 Culture-dependent and culture-independent characterization of microorganisms  
859 associated with *Aedes aegypti* (Diptera: Culicidae) (L.) and dynamics of bacterial  
860 colonization in the midgut. Acta Tropica. 2010;115(3):275-81. doi:  
861 10.1016/j.actatropica.2010.04.011.
- 862 73. Tsai YL, Hayward RE, Langer RC, Fidock DA, Vinetz JM. Disruption of  
863 *Plasmodium falciparum* Chitinase Markedly Impairs Parasite Invasion of Mosquito  
864 Midgut. Infection and Immunity. 2001;69(6):4048-54. doi: 10.1128/IAI.69.6.4048-  
865 4054.2001.
- 866 74. Goebel W, Gross R. Intracellular survival strategies of mutualistic and parasitic  
867 prokaryotes. Trends Microbiol. 2001;9(6):267-73. Epub 2001/06/08.
- 868 75. Kumar S, Molina-Cruz A, Gupta L, Rodrigues J, Barillas-Mury C. A  
869 peroxidase/dual oxidase system modulates midgut epithelial immunity in *Anopheles*  
870 *gambiae*. Science. 2010;327(5973):1644-8. doi: 10.1126/science.1184008.
- 871 76. Brady C, Cleenwerck I, Venter S, Coutinho T, De Vos P. Taxonomic evaluation  
872 of the genus *Enterobacter* based on multilocus sequence analysis (MLSA): Proposal to  
873 reclassify *E. nimipressuralis* and *E. amnigenus* into *Lelliottia* gen. nov. as *Lelliottia*

874 *nimipressuralis* comb. nov. and *Lelliottia amnigena* comb. nov., respectively, *E.*  
875 *gergoviae* and *E. pyrinus* into *Pluralibacter* gen. nov. as *Pluralibacter gergoviae* comb.  
876 nov. and *Pluralibacter pyrinus* comb. nov., respectively, *E. cowanii*, *E. radicincitans*, *E.*  
877 *oryzae* and *E. arachidis* into *Kosakonia* gen. nov. as *Kosakonia cowanii* comb. nov.,  
878 *Kosakonia radicincitans* comb. nov., *Kosakonia oryzae* comb. nov. and *Kosakonia*  
879 *arachidis* comb. nov., respectively, and *E. turicensis*, *E. helveticus* and *E. pulveris* into  
880 *Cronobacter* as *Cronobacter zurichensis* nom. nov., *Cronobacter helveticus* comb. nov.  
881 and *Cronobacter pulveris* comb. nov., respectively, and emended description of the  
882 genera *Enterobacter* and *Cronobacter*. *Systematic and Applied Microbiology*.  
883 2013;36(5):309-19. doi: <https://doi.org/10.1016/j.syapm.2013.03.005>.  
884 77. Gouy M, Guindon S, Gascuel O. SeaView version 4: A multiplatform graphical  
885 user interface for sequence alignment and phylogenetic tree building. *Molecular biology*  
886 *and evolution*. 2010;27(2):221-4. Epub 2009/10/23. doi: 10.1093/molbev/msp259.  
887 78. Peleg J. Growth of arboviruses in primary tissue culture of *Aedes aegypti*  
888 embryos. *Am J Trop Med Hyg*. 1968;17.  
889 79. Horn T, Boutros M. E-RNAi: a web application for the multi-species design of  
890 RNAi reagents--2010 update. *Nucleic Acids Research*. 2010;38(Web Server  
891 issue):W332-9. doi: 10.1093/nar/gkq317.  
892 80. Livak KJ, Schmittgen TD. Analysis of Relative Gene Expression Data Using  
893 Real-Time Quantitative PCR and the  $2^{-\Delta\Delta CT}$  Method. *Methods (San Diego, Calif)*.  
894 2001;25(4):402-8. doi: 10.1006/meth.2001.1262.  
895 81. Isoe J, Collins J, Badgandi H, Day WA, Miesfeld RL. Defects in coatomer protein  
896 I (COPI) transport cause blood feeding-induced mortality in Yellow Fever mosquitoes.

897 Proceedings of the National Academy of Sciences of the United States of America.  
898 2011;108(24):E211-7. doi: 10.1073/pnas.1102637108.

899 82. Saldaña MA, Etebari K, Hart CE, Widen SG, Wood TG, Thangamani S, et al.  
900 Zika virus alters the microRNA expression profile and elicits an RNAi response in *Aedes*  
901 *aegypti* mosquitoes. PLoS Neglected Tropical Diseases. 2017;11(7):e0005760-18. doi:  
902 10.1371/journal.pntd.0005760.

903 83. Coon KL, Vogel KJ, Brown MR, Strand MR. Mosquitoes rely on their gut  
904 microbiota for development. Molecular Ecology. 2014;23(11):2727-39. doi:  
905 10.1111/mec.12771.

906

907

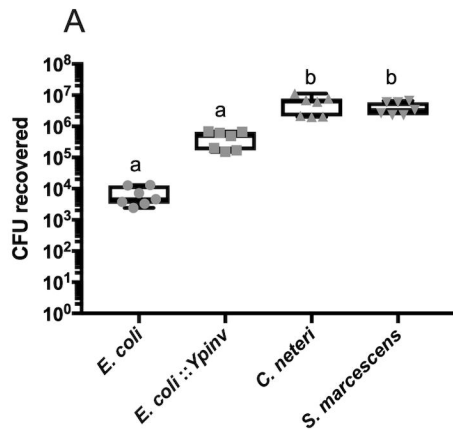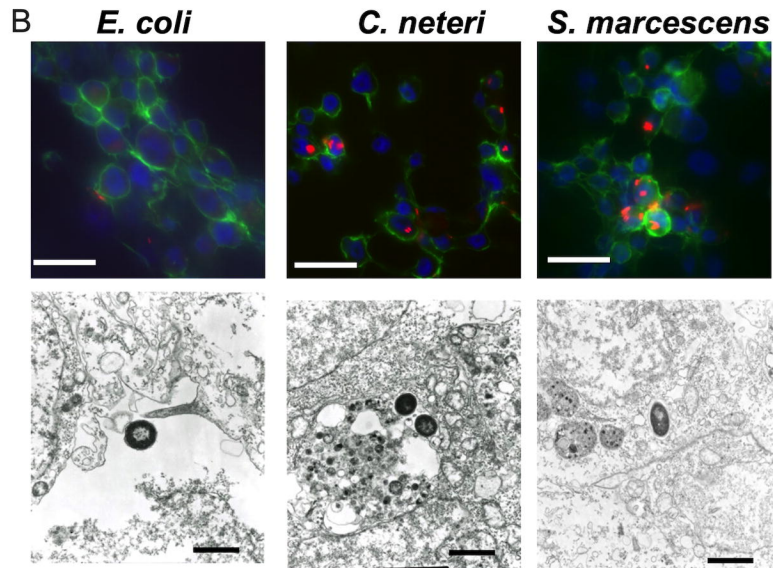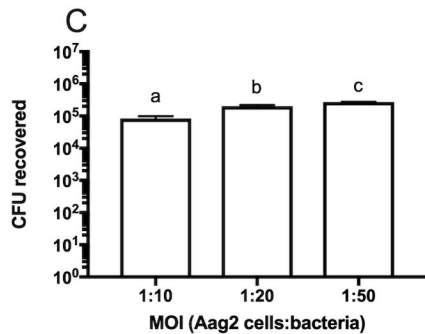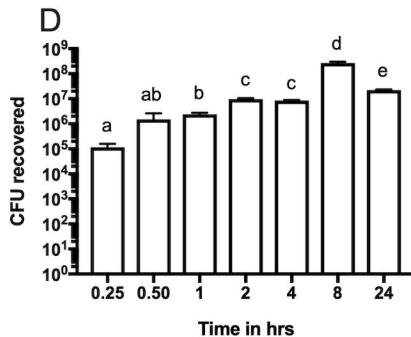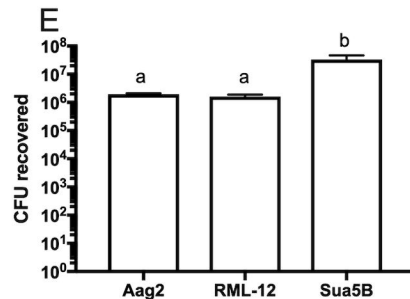

A

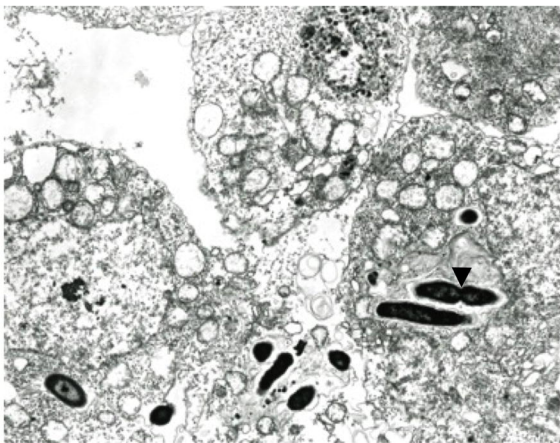

B

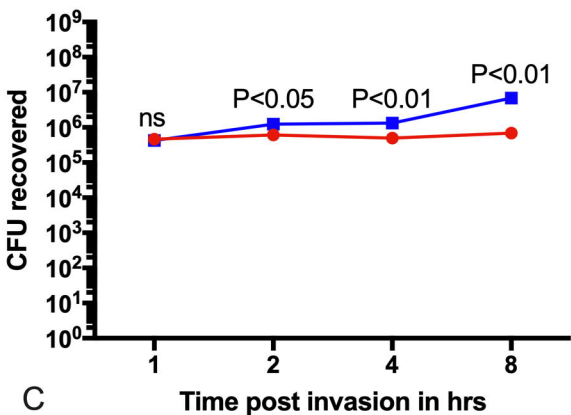

C

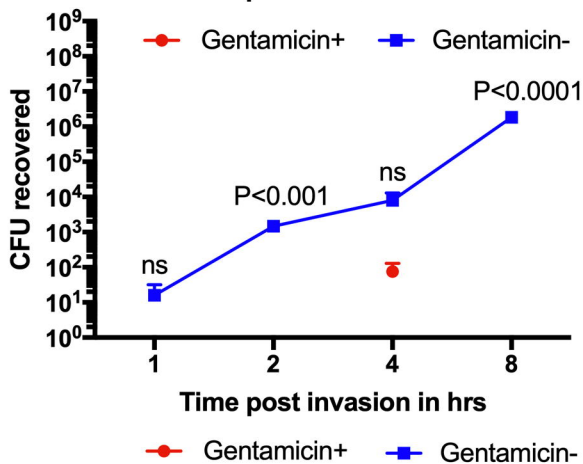

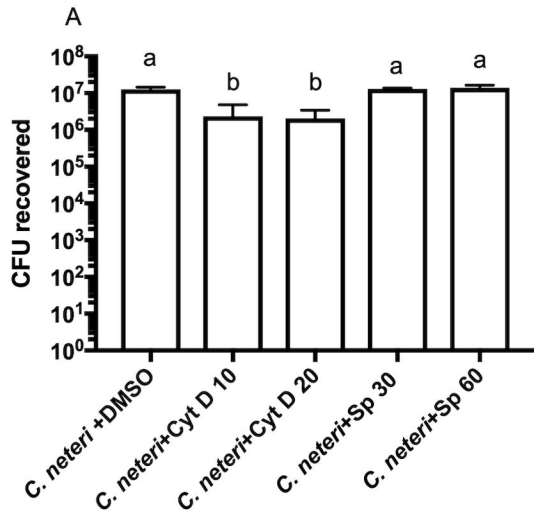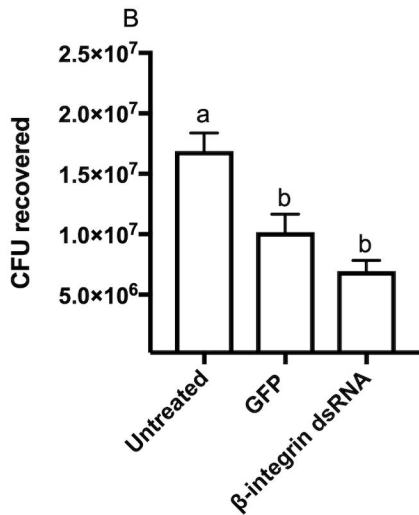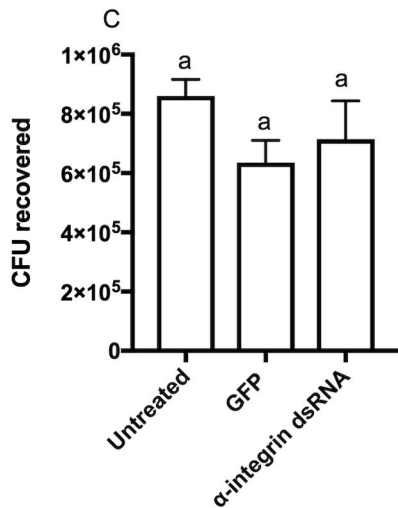

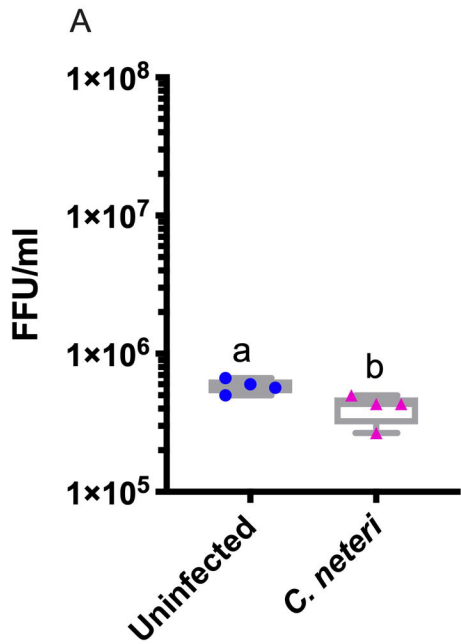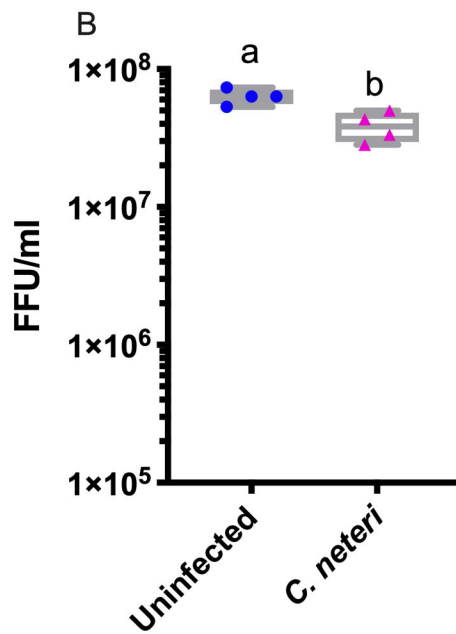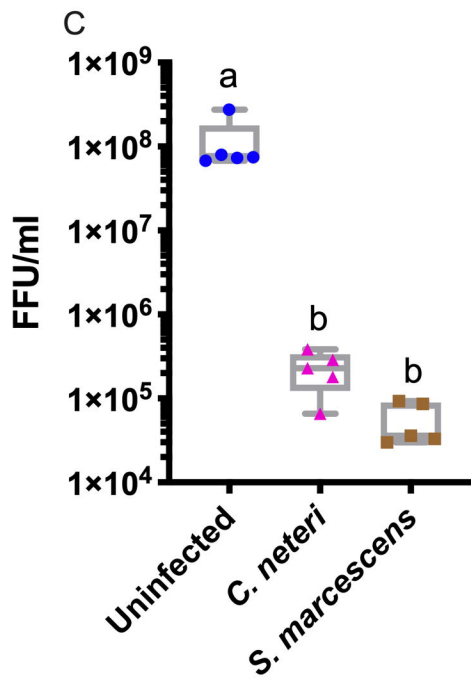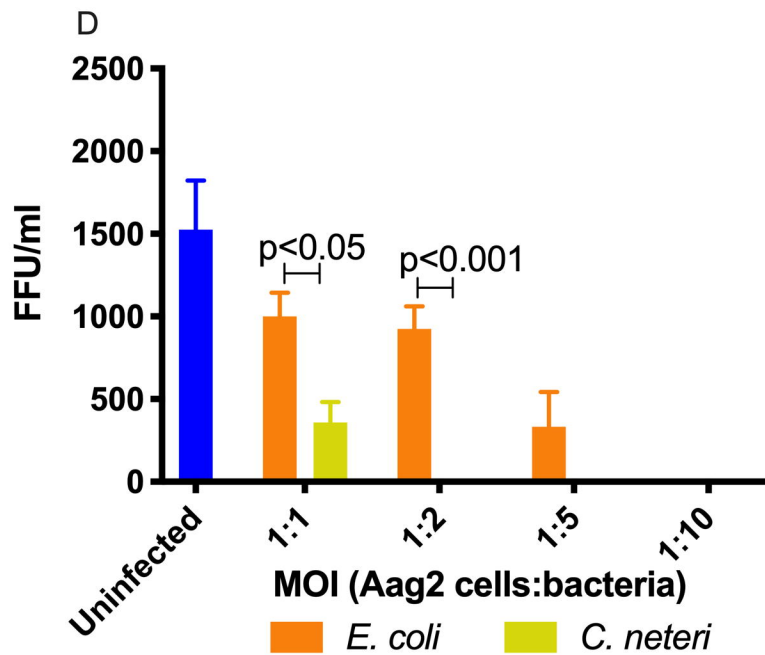

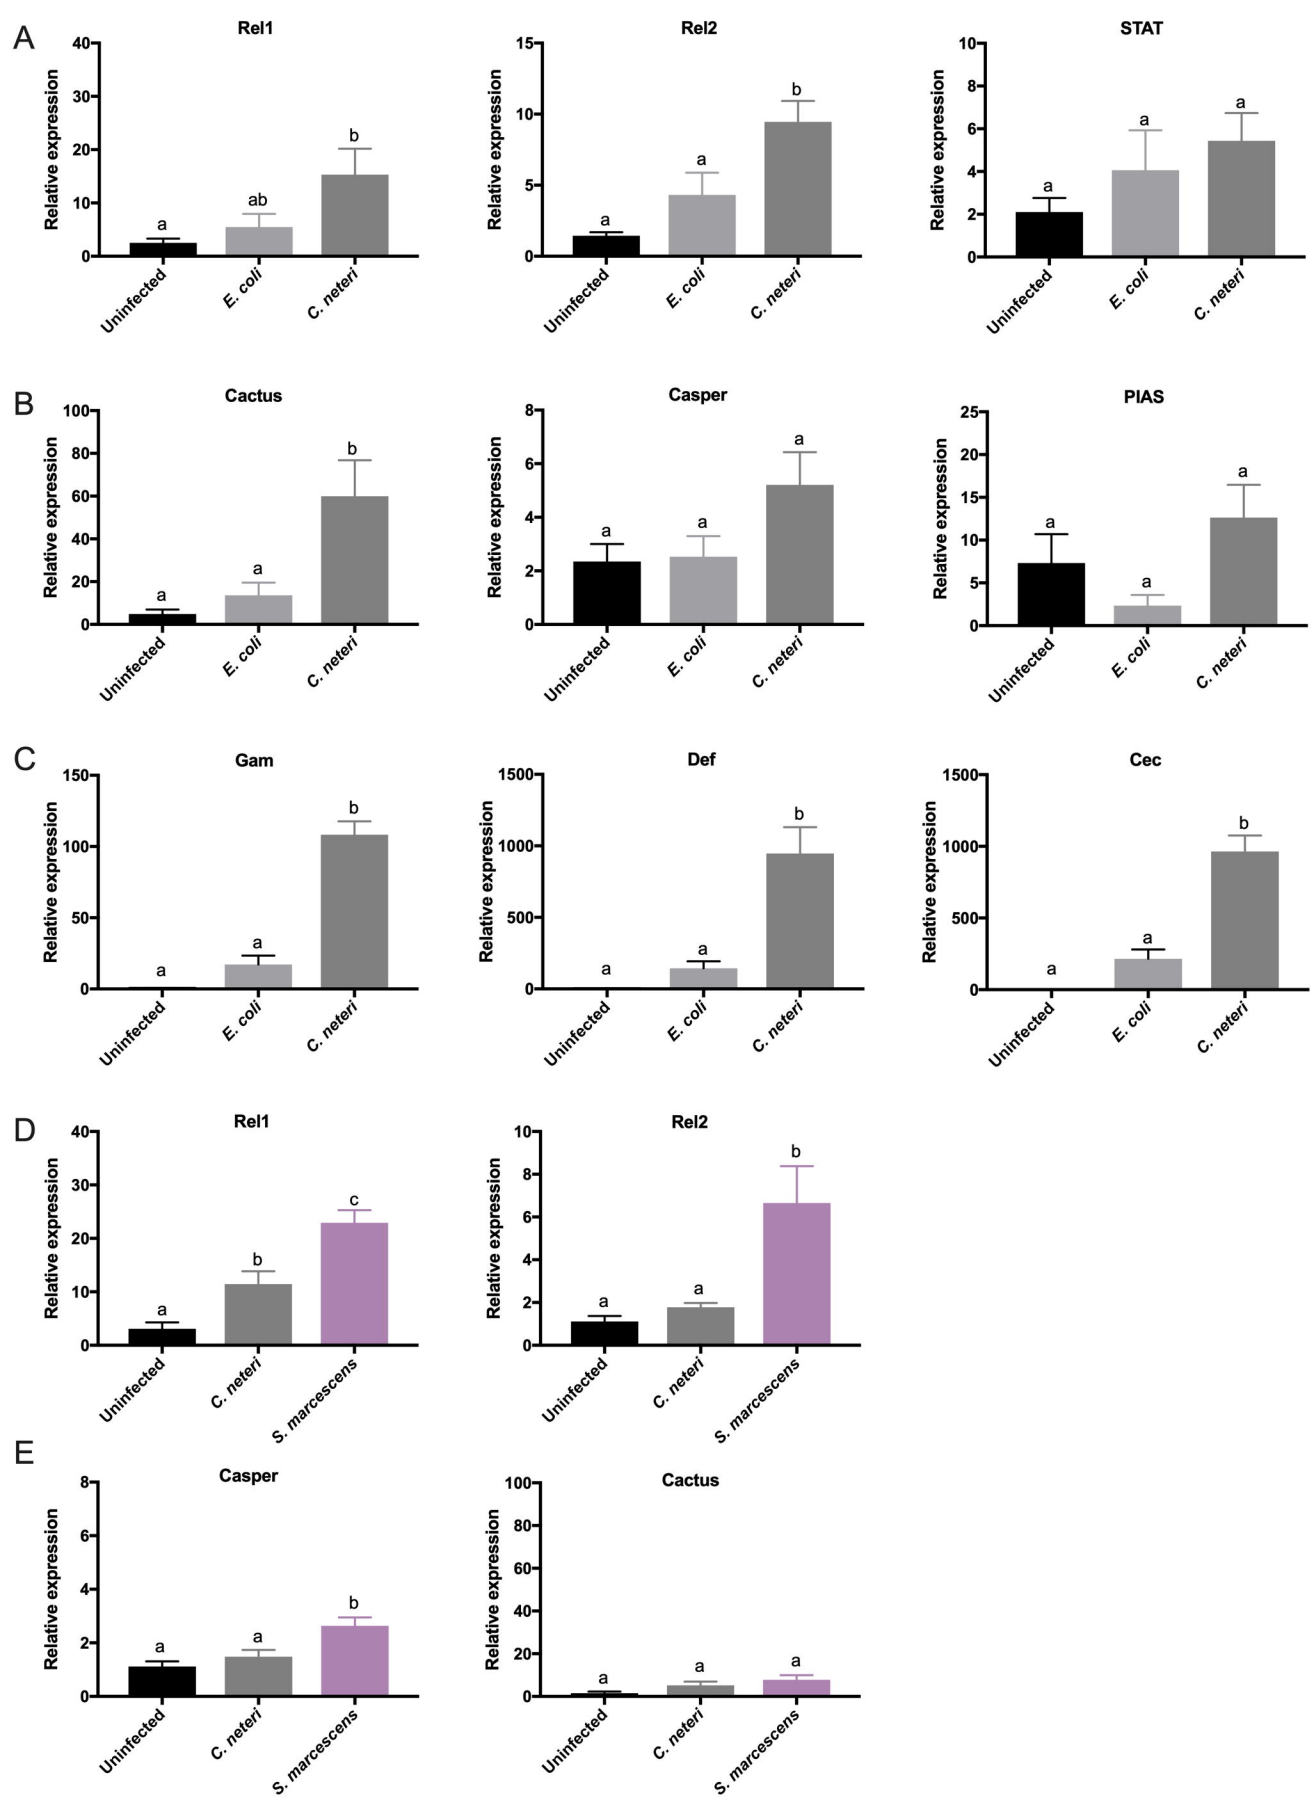



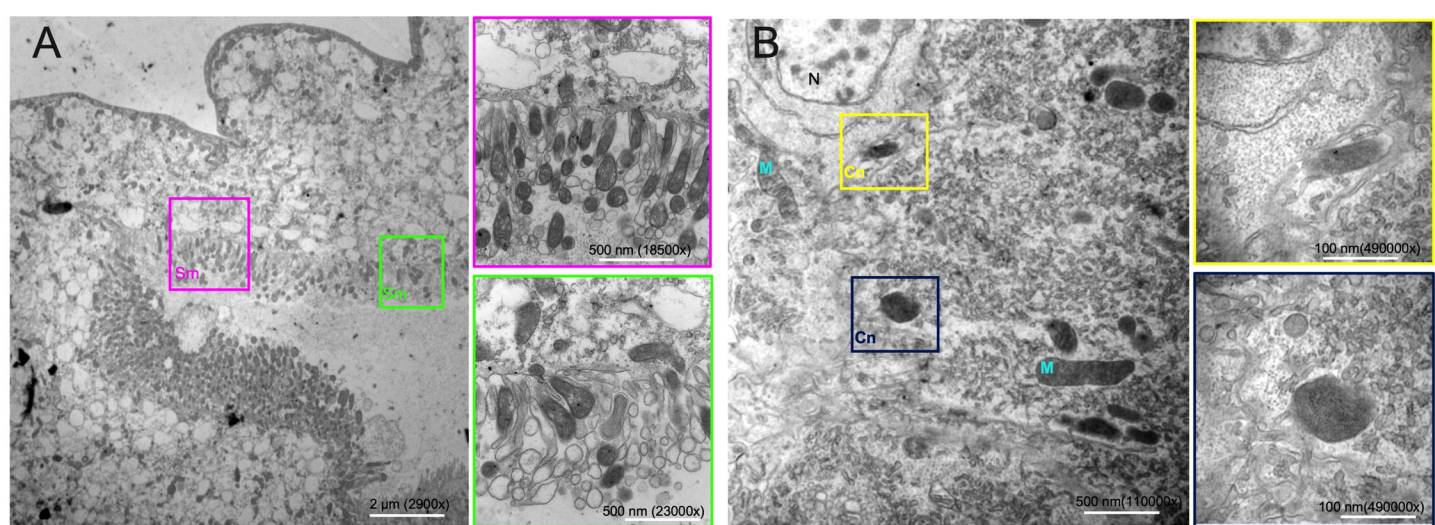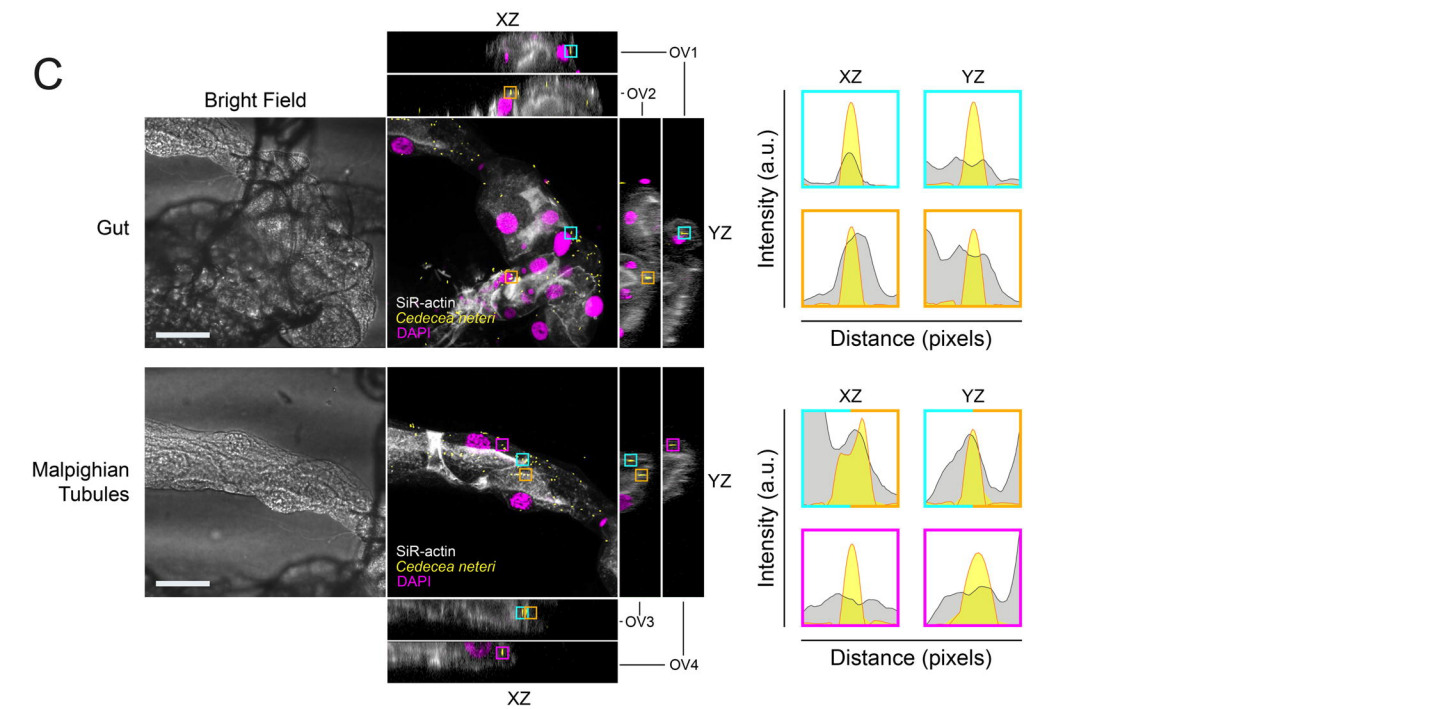

Source: http://biorxiv.org/content/10.1101/866897v1.full.pdf
