1 **Gut-associated bacteria invade the midgut epithelium of *Aedes aegypti* and**  
2 **stimulate innate immunity and suppress Zika virus infection in cells.**

3

4 Shivanand Hegde<sup>1,2</sup>, Denis Voronin<sup>3</sup>, Aitor Casas-Sanchez<sup>1,2</sup> Miguel A. Saldaña<sup>4</sup>, Eva  
5 Heinz<sup>1,5</sup>, Alvaro Acosta-Serrano<sup>1,2</sup>, Vsevolod L. Popov<sup>6</sup>, Ashok K. Chopra<sup>4</sup>, Grant L.  
6 Hughes<sup>1,2#</sup>

7

8 <sup>1</sup>Department of Vector Biology, Liverpool School of Tropical Medicine, Liverpool, United  
9 Kingdom

10 <sup>2</sup>Department of Tropical Disease Biology, Liverpool School of Tropical Medicine,  
11 Liverpool, United Kingdom

12 <sup>3</sup>Laboratory of Molecular Parasitology, New York Blood Center, New York, NY, USA

13 <sup>4</sup>Department of Microbiology and Immunology, University of Texas Medical Branch,  
14 Galveston, TX, USA.

15 <sup>5</sup>Department of Clinical Sciences, Liverpool School of Tropical Medicine, Liverpool,  
16 United Kingdom.

17 <sup>6</sup>Department of Pathology, University of Texas Medical Branch, Galveston, TX, USA.

18 #Corresponding author. Grant Hughes: [grant.hughes@lstmed.ac.uk](mailto:grant.hughes@lstmed.ac.uk)

19

20

21

22

23 **Abstract**

24 Microbiota within mosquitoes influence nutrition, immunity, fecundity, and the capacity  
25 to transmit pathogens. Despite their importance, we have a limited understanding of  
26 host-microbiota interactions, especially at the cellular level. It is evident bacterial  
27 symbionts that are localized within the midgut also infect other organs within the  
28 mosquito; however, the route these symbionts take to colonize other tissues is  
29 unknown. Here, utilizing the gentamicin protection assay, we showed that the bacterial  
30 symbionts *Cedecea* and *Serratia* have the capacity to invade and reside intracellularly  
31 within mosquito cells. Symbiotic bacteria were found within a vacuole and bacterial  
32 replication was observed in mosquito cell by transmission electron microscopy,  
33 indicating bacteria were adapted to the intracellular milieu. Using gene silencing, we  
34 determined that bacteria exploited host factors, including actin and integrin receptors, to  
35 actively invade mosquito cells. As microbiota can affect pathogens within mosquitoes,  
36 we examined the influence of intracellular symbionts on Zika virus (ZIKV) infection.  
37 Mosquito cells harbouring intracellular bacteria had significantly less ZIKV compared to  
38 uninfected cells or cells exposed to non-invasive bacteria. Intracellular bacteria were  
39 observed to substantially upregulate the Toll and IMD innate immune pathways,  
40 providing a possible mechanism mediating these anti-viral effects. Examining mono-  
41 axenically infected mosquitoes using transmission electron and fluorescent microscopy  
42 revealed that bacteria occupied an intracellular niche *in vivo*. Our results provided  
43 evidence that bacteria that associate with the midgut of mosquitoes have intracellular  
44 lifestyles which likely have implications for mosquito biology and pathogen infection.  
45 This study expands our understanding of host-microbiota interactions in mosquitoes,

46 which is important as symbiont microbes are being exploited for vector control  
47 strategies.

48

## 49 **Introduction**

50 Mosquitoes are holometabolous insects with aquatic and terrestrial life stages. Aquatic  
51 stages are continually exposed to microbes in the larval habitat while adults likely  
52 acquire microbiota from the environment after eclosion or when nectar feeding [1-3].  
53 Additionally, environmentally acquired microbes may persist in mosquito tissues  
54 between aquatic and adult life states facilitating transstadial transmission [4-6]. It is  
55 likely that these processes contribute to the considerable variability seen in the adult  
56 microbiome [7-9]. While our understanding of genetic factors that influence host-  
57 microbe interactions and microbiome acquisition are expanding [10, 11], we still have a  
58 poor knowledge of these interactions at the cellular level. Given the importance of the  
59 microbiome on mosquito traits relevant for vectorial capacity and vector competence  
60 [12-15], understanding processes that influence microbiome homeostasis is critical for  
61 developing microbial-based control strategies [16, 17].

62  
63 Bacterial microbiota often resides within several organs in mosquitoes and appears to  
64 be able to migrate between tissues. Several studies have identified bacteria in the gut of  
65 mosquitoes [9, 18-20], which have led to these microbes being commonly referred to as  
66 gut microbes, but many of these bacterial species also colonize other tissues such as  
67 the salivary gland [18, 20-23], reproductive tract [20, 22, 24], or malpighian tubules [4].  
68 While some bacteria are unique to each tissue, several infect multiple tissues within the  
69 mosquito [20, 25], and localization in organs such as the malpighian tubules and  
70 reproductive tissues likely enables transmission between life stages and generations,  
71 respectively. Both *Asaia* and *Serratia* are transferred vertically to progeny after

72 administered to the mosquito in a sugar meal, suggesting symbiotic bacteria have the  
73 capacity to translocate from the midgut to the germline of their host [20, 26-28].  
74 However, mechanisms facilitating their translocation remain elusive. Infection of the  
75 entomopathogenic fungus *Beauveria* of *Anopheles* mosquitoes enabled *Serratia* to escape  
76 the midgut and over replicate in the hemolymph, which was the cause of mortality to the  
77 insect [29]. In *Drosophila*, orally infected *Serratia* localized within the midgut epithelium  
78 [30]. While the epithelial infection was rare in wild type flies, *Serratia* was observed to  
79 localize intracellularly in *imd* knock-out flies, suggesting that host immunity influenced  
80 cellular localization or controlled infections [30]. Although intracellular bacterial  
81 infections have been observed in the midgut of flies [30], cellularity of gut-associated  
82 bacterial infections in mosquitoes and the mechanism facilitating systemic infection of  
83 different tissues is largely unknown. It is plausible that an intracellular lifestyle could  
84 provide a mechanism for transstadial and vertical transmission of bacteria in mosquito  
85 vectors.

86  
87 In mammalian systems, bacteria exploit their invasive capability to colonize host tissue  
88 and systemically spread within multicellular organisms [31-33]. Pathogenic bacteria like  
89 *Listeria*, *Salmonella*, *Vibrio*, and *Yersinia* invade host cells to colonize, replicate, and  
90 migrate between cells [32]. While the invasive capacity and mechanisms have been  
91 studied extensively in mammalian cells, *in vitro* investigation in mosquitoes or other  
92 arthropod vectors is lacking. In order to obtain a more complete understanding of the  
93 cellularity of bacteria associated with mosquitoes, we assessed the invasive capability  
94 of two common *Enterobacteriaceae* bacteria in mosquito cells using the gentamicin

95 invasion assay. Using this *in vitro* assay, we characterized the invasive process,  
96 examined the mechanisms by which bacteria invade cells, and assessed the effect of  
97 intracellular bacteria on host immunity and Zika virus (ZIKV) infection. Importantly, using  
98 mono-axenically infected mosquitoes, we found that these bacteria have intracellular  
99 localization in mosquitoes. This work expands our understanding of host-microbe  
100 interactions of gut-associated symbionts in medically relevant mosquito vectors at the  
101 cellular level.

102

## 103 **Results and Discussion**

### 104 **Symbiotic bacteria invade mosquito cells *in vitro***

105 Horizontally acquired bacteria are generally considered to infect the gut lumen, they are  
106 also found in other organs of mosquitoes including the salivary glands, malpighian  
107 tubules, and germline [3, 4, 6, 25, 34]. It remains unknown how these tissues become  
108 infected, but it has been proposed these organs may act as a reservoir to facilitate  
109 transstadial transmission of microbes between mosquito life stages [4, 5]. One  
110 possibility is that gut bacteria exploit their intracellular lifestyle to transition between host  
111 tissues. Therefore, we investigated the capacity of bacteria commonly found in the gut  
112 of mosquitoes to invade mosquito host cells. We isolated two bacteria within the  
113 *Enterobacteriaceae* family, *Serratia* sp. and *Cedecea neteri*, by conventional  
114 microbiological culturing approaches, and evaluated their invasive capacity using the  
115 gentamicin invasion assay [35].

116

117 While invasion assays are routinely used for pathogenic bacteria in mammalian cells,  
118 the assay is not commonly undertaken with mosquito cells. We performed the  
119 gentamicin invasion assay in Aag2 (*Aedes aegypti*) and Sua5B (*Anopheles gambiae*)  
120 cell lines comparing the invasion of *E. coli* BL21 (DE3) with or without the *Yersinia*  
121 *pseudotuberculosis* (*Yp*) *invasin* (*inv*) gene to invasion of these bacteria in Vero cells  
122 (Monkey Kidney cells). In mammalian systems, heterologous expression of the *Ypinv*  
123 gene facilitates invasion of *E. coli* into cell lines [36-38]. Similar to mammalian systems,  
124 we found that *E. coli* expressing the *Ypinv* gene had significantly increased invasion in  
125 Aag2 cells compared to the non-invasive *E. coli* control (Fig. S1, Unpaired t test,  $p <$   
126  $0.05$ ), while no statistical difference was seen in the Sua5B cell line, likely due to high  
127 variability among replicates ( $p > 0.05$ , Unpaired t test). As expected, *E. coli* expressing  
128 the *inv* gene invaded at significantly higher rates in Vero cells compared to non-invasive  
129 *E. coli* ( $p < 0.05$ , Unpaired t test). While several insect cell lines are naturally phagocytic  
130 [39, 40], our data suggested bacteria were actively invading Aag2 cells, and as such,  
131 we conducted the majority of our experiments with this cell line. Next, we completed the  
132 gentamicin invasion assay with the two gut-associated bacteria from mosquitoes, *C.*  
133 *neteri* and *Serratia* sp., and used *E. coli* with and without the *Ypinv* gene as the positive  
134 and negative controls, respectively. The native symbionts exhibited significantly higher  
135 rates of invasion compared to the *E. coli* expressing *Ypinv* (ANOVA with Tukey's  
136 multiple comparison test,  $p < 0.05$ ) or wildtype *E. coli* (Fig. 1A, ANOVA with Tukey's  
137 multiple comparison test,  $p < 0.01$ ) indicating native gut-associated microbes have the  
138 capacity to invade insect cells and are more adept at this process compared to non-  
139 native *E. coli* expressing mammalian invasive factors.

140

141 To further confirm the results from the gentamicin invasion assay, fluorescent and  
142 transmission electron microscopy (TEM) were performed on cells after invasion. In  
143 order to observe the invaded bacteria in cells using fluorescent microscopy, bacteria  
144 were transformed with a plasmid that expressed the mCherry fluorescent protein [41].  
145 Similar to our quantitative results from the invasion assay, we observed a greater  
146 number of intracellular bacteria in the *Serratia* and *Cedecea* treatments compared to the  
147 *E. coli* negative control (Fig. 1B and Fig. S2). TEM images confirmed both symbionts  
148 isolated from mosquitoes were intracellular, and that bacteria were inside a vacuole  
149 (Fig. 1B, black arrowhead). *E. coli* did not invade cells and was found exclusively  
150 extracellularly. Bacterial encapsulation within a vacuole is a typical signature of invading  
151 bacteria in mammalian systems [42] as well as obligatory intracellular bacteria of insects  
152 such as *Wolbachia* [43]. Taken together, it is evident that both symbionts isolated from  
153 the mosquitoes can invade the host cells *in vitro*.

154

155 Next, we characterized the invasion process of *Cedecea* examining how the multiplicity  
156 of infection (MOI) and incubation time influenced invasion. We noted a linear increase in  
157 the number of intracellular *Cedecea* with increasing multiplicity of infection (MOI) (Fig.  
158 1C, ANOVA with Tukey's multiple comparison test,  $p < 0.05$ ). We then varied the  
159 invasion time and observed bacterial invasion as early as 15 minutes post infection and  
160 invasion increased until 8 hr post infection (Fig. 1D, ANOVA with Tukey's multiple  
161 comparison test,  $p < 0.05$ ). We also examined the invasive ability of *C. neteri* in  
162 different mosquito cells lines. The invasion of this bacterium was similar in both *Ae.*



163 *aegypti* cell lines Aag2 and RML-12 (Fig. 1E, Tukey's multiple comparison test,  $p <$   
164 0.05); however, a greater number of intracellular bacteria were seen in the Sua5B cells.

165

### 166 ***In vitro* intracellular replication and egression of *Cedecea neteri***

167 While undertaking TEM, we captured an image of intracellular replication of *C. neteri*  
168 within mosquito cells (Fig. 2A). Given that bacteria were seen to replicate in the  
169 intracellular environment, we attempted to culture these bacteria in Aag2 cells in a  
170 similar manner to *in vitro* propagation of other intracellular bacteria such as *Wolbachia*  
171 [44]. However, our culturing attempts were unsuccessful as the cell culture media  
172 became contaminated with the inoculated *C. neteri*, despite the extracellular bacteria,  
173 which had not invaded, being killed by gentamicin treatment. We hypothesized that  
174 intracellular *Cedecea* were egressing from the cells and replicating within the cell  
175 culture media.

176

177 We therefore undertook experiments to quantify bacterial egression from the cells. After  
178 allowing *C. neteri* to invade, Aag2 cells were incubated with or without gentamicin and  
179 intracellular and extracellular bacteria were quantified over time. Within the cell,  
180 bacterial numbers remained constant in the presence of gentamicin while in the  
181 absence of antibiotic, there was an an approximate 10-fold increase at eight hours post  
182 infection (Fig. 2B, Unpaired t test,  $p < 0.05$ ). In the cell culture media, we observed a  
183 precipitous increase in bacteria in the absence of antibiotic and recovered little to no  
184 viable bacteria when antibiotics were included in the media (Fig. 2C, Unpaired t test,  
185  $p < 0.05$ ). These data indicated that *C. neteri* was egressing from the cells, replicating in

186 the cell culture media in the absence of antibiotic and then re-invading mosquito cells,  
187 which accounted for the significantly higher titer of intracellular *Cedecea* in the non-  
188 antibiotic treated cells at 8 hours post infection. We found few changes in the total  
189 number of mosquito cells in gentamicin treated or untreated cells, although there was a  
190 subtle but significant reduction in cell number after 8 hours in the treatment without  
191 antibiotics (Fig. S3, Unpaired t test,  $p < 0.0001$ ). However, overall, these data indicated  
192 that bacterial invasion and egression were not overly detrimental to the host cells.

193

#### 194 **Host actin and integrin are important for *Cedecea neteri* invasion**

195 The lack of damage to host cells indicates non-lysis mediated exit of bacteria from host  
196 cells. While this would be expected from a mutualistic or commensal gut-associated  
197 bacterium, even some pathogens such as *Mycobacteria*, *Shigella*, and *Chlamydia* use  
198 protrusions and non-lytic exocytosis to exit the host cells without lysis of host cells [45-  
199 48]. The former method involves membrane extensions containing bacteria mediated by  
200 actin polymerization and ultimately these protruded structures are engulfed by  
201 neighboring cells resulting in the transfer of content to adjoining cell [49]. We therefore  
202 hypothesized that *C. neteri* may use actin-based motility as a mechanism to invade and  
203 exit cells.

204

205 To determine the role of the actin cytoskeleton in invasion of bacteria into mosquito  
206 cells, we inhibited the polymerization of actin filaments using cytochalasin D [50]. We  
207 observed a 3-fold reduction in invasion of *Cedecea* in the presence of cytochalasin D  
208 (Fig. 3A, ANOVA with Tukey's multiple comparison test,  $p < 0.001$ ). In contrast, there

209 was no change in intracellular bacteria when cells were treated with SP600125, which  
210 inhibits phagocytosis in mosquito cells [51]. These data suggested that the actin  
211 cytoskeleton is co-opted by *C. neteri* to gain access to the intracellular milieu, and that  
212 phagocytosis played a minimal role in the invasion of bacteria. Similar processes have  
213 been observed in other bacteria-host systems. For example, obligatory intracellular  
214 bacteria such as *Rickettsia*, *Chlamydia*, and *Ehrlichia* hijack the host cell cytoskeletal  
215 and surface proteins to invade, survive and spread within cells [52-54]

216

217 We then examined whether host receptors facilitate the bacterial entry into mosquito  
218 cells. In mosquitoes, integrins are involved in the engulfment of *E. coli* and malaria  
219 parasites [55], while pathogenic bacteria of humans also exploit these receptors to  
220 invade mammalian host cells [56-58]. Using RNAi, we silenced the alpha and beta  
221 subunit of the integrin receptor and challenged cells with *C. neteri*. After confirming  
222 gene silencing (Fig. S4 A and B), we found significantly fewer intracellular bacteria after  
223 knocking down the beta-integrin (Fig. 3B, ANOVA with Tukey's multiple comparison  
224 test,  $p < 0.05$ ), but no differences in the rate of *Cedecea* invasion when the alpha-  
225 integrin gene was silenced (Fig. 3C, ANOVA with Tukey's multiple comparison test,  $p >$   
226  $0.05$ ). These results indicated that symbiotic *C. neteri* utilized actin filaments and the  
227 beta-integrin receptor to gain entry into the host cells.

228

### 229 **Intracellular *Cedecea* reduces ZIKV replication in mosquito cells**

230 Midgut-associated bacteria can affect pathogens transmitted by mosquitoes by direct or  
231 indirect interactions [59-61]. Therefore, we examined how intracellular *C. neteri* affected

232 viral infection. The symbiont significantly reduced ZIKV loads in cell lines compared to  
233 uninfected controls at both two (Fig. 4A, Unpaired t test,  $p < 0.05$ ) and four (Fig. 4B,  
234 Unpaired t test,  $p < 0.01$ ) days post virus infection (dpvi) (Fig 4A and 4B). Similar to  
235 *Cedecea*, intracellular *Serratia* also significantly reduced ZIKV density by four logs  
236 compared to the uninfected cells at four dpvi (Fig. 4C, ANOVA with Tukey's multiple  
237 comparison test,  $p < 0.05$ ). To determine how the density of bacteria influenced viral  
238 infection, we infected cells at increasing bacterial MOIs before inoculating with virus. At  
239 lower MOIs (1:1 and 1:2), *Cedecea* significantly reduced ZIKV compared to the *E. coli*  
240 (MOI 1:1, Unpaired t test,  $p < 0.01$ , MOI 1:2, Unpaired t test,  $p < 0.0001$ ). However, at  
241 higher MOIs, we noted that both *Cedecea* and *E. coli* reduced ZIKV compared to the  
242 uninfected control. The complete blockage of ZIKV at the higher MOIs suggested that  
243 even non-invasive bacteria can overwhelm viral infection, likely by induction of the  
244 immune effector molecules that are antagonistic to viral infection. Taken together, our  
245 results suggested that members of *Enterobacteriaceae* that commonly infect  
246 mosquitoes have the capacity to interfere with viral pathogens when they are  
247 intracellular.

248

#### 249 ***Cedecea* invasion stimulates mosquito immunity**

250 There is a complex interplay between the host innate immune system and microbiota  
251 which maintains microbiome homeostasis [16, 62, 63]. However, invading arboviral  
252 pathogens are also susceptible to these immune pathways [64, 65] thereby providing an  
253 indirect mechanism by which microbiota can interfere with pathogens. We therefore  
254 examined the immune response of mosquito cells challenged with *Cedecea* or *E. coli*

255 comparing these responses to uninfected cells. We quantified the transcription factors  
256 (*rRel1*, *rRel2* and *Stat*) and negative regulators (*Cactus*, *Caspar*, and *PIAS*) of the Toll,  
257 IMD and Jak/Stat immune pathways as well as downstream effector molecules  
258 (*gambicin*, *defensin* and *cecropin*). We found the NF- $\kappa$ B transcription factor *Rel2* was  
259 significantly upregulated by *Cedecea* compared to both the *E. coli* (ANOVA with Tukey's  
260 multiple comparison test,  $p < 0.05$ ) and the uninfected control (ANOVA with Tukey's  
261 multiple comparison test,  $p < 0.01$ ), while a significant difference was only observed for  
262 *Rel1* when the *Cedecea* treatment was compared to the uninfected control (ANOVA  
263 with Tukey's multiple comparison test,  $p < 0.05$ ; Fig 5A). The negative regulator of the  
264 Toll pathway, *Cactus*, was significantly upregulated compared to both the *E. coli* (Fig.  
265 5B, ANOVA with Tukey's multiple comparison test,  $P < 0.05$ ) and uninfected control  
266 (ANOVA with Tukey's multiple comparison test,  $p < 0.01$ ), while no changes were seen  
267 for *Caspar*, the negative regulator of the IMD pathway (Fig. 5B, ANOVA with Tukey's  
268 multiple comparison test,  $p > 0.05$ ). Similarly, no significant changes were observed for  
269 genes in the Jak/Stat pathway. Taken together, these data suggested that the Toll and  
270 IMD pathways were induced by invasion of *Cedecea* into mosquito cells. This is  
271 consistent with previous observations which demonstrated interplay between native  
272 microbiota and mosquito innate immune pathways [61, 66-68]. We observed dramatic  
273 modulation of effector molecules with *Defensin*, *Cecropin* and *Gambicin*, all significantly  
274 enhanced by *Cedecea*. Strikingly, *Cecropin* and *Defensin* expression was nearly 1000-  
275 fold higher (Fig. 5C, Tukey's multiple comparison test,  $p < 0.0001$ ) whereas *Gambicin*  
276 (Fig. 5C, Tukey's multiple comparison test,  $p < 0.001$ ) was elevated 100-fold in cells  
277 inoculated with *Cedecea* compared to the non-infected control. In mosquitoes, these

278 downstream effector molecules are co-regulated by the Toll and IMD pathways [66],  
279 which could explain their prolific enhancement given that intracellular *Cedecea*  
280 stimulated both pathways. As arboviral pathogens also interact with innate immune  
281 pathways, we examined gene expression in cells when co-infected with ZIKV and *C.*  
282 *neteri* focusing on the NF- $\kappa$ B transcription factors and negative regulators of the Toll  
283 and IMD pathways. Patterns of gene expression were similar to the ZIKV uninfected  
284 cells with the exception of *Cactus*, where no significant differences were seen across  
285 bacterial treatments (Fig. 5D and E), suggesting that ZIKV was stimulating the Toll  
286 pathway as the negative regulator was depleted when comparing to ZIKV uninfected  
287 cells.

288

### 289 **Intracellular *Enterobacteriaceae* within the *Aedes* gut epithelium**

290 To determine the capacity of *C. neteri* and *Serratia* sp. to invade host cells *in vivo*, we  
291 reared *Ae. aegypti* mosquitoes mono-axenically with either symbiont and analyzed  
292 tissues from larvae and adults by TEM and Confocal Laser Scanning Microscopy  
293 (CLSM). While it was evident there was an accumulation of extracellular *Serratia* in the  
294 lumen of the larval gut (Fig. 6A-B), we also identified bacteria that were associated with  
295 the microvilli. Specifically, we found examples of *Serratia* in the process of transitioning  
296 to or from the midgut epithelial cells. We appreciate our results cannot conclusively  
297 determine if *Serratia* was in the process of invading or egressing from cells, but  
298 regardless, it suggested that the bacterium had been or was soon to be intracellular.  
299 Analysis of gut tissue isolated from adult *Ae. aegypti* mosquitoes infected with *C. neteri*  
300 revealed the presence of bacteria in the cytosol of epithelial cells (Fig. 6B). Closer

301 inspection of these images revealed the bacterium was localized within a vacuole (Fig.  
302 6B, yellow insert), which is a typical signature of intracellular bacteria. Here, *C. neteri*  
303 may be exiting the membrane (Fig. 6B, inserts, white arrow), suggesting these bacteria  
304 can egress from the membrane bound compartment which could facilitate their  
305 replication and spreading.–Egression and re-entry mechanisms are used by several  
306 pathogenic bacteria like *Listeria monocytogenes* and *Shigella flexneri* to escape the  
307 vacuoles to replicative niches [69]. We also confirmed the intracellular localization of *C.*  
308 *neteri* in adult infected guts by CLSM. The orthogonal views of the 3D-reconstructed  
309 tissues locate bacteria on the cells as well as inside cells of the posterior gut,  
310 demonstrated by the co-localization of actin staining with mCherry signal from bacteria  
311 (Fig. 6C, Fig. S5, Supplementary video 1). We also found bacteria inside the cells of the  
312 Malpighian tubules (Fig. 6C, Fig. S5, Supplementary video 2). Altogether, TEM and  
313 CLSM results clearly show bacteria residing inside the host cells *in vivo*.

314  
315 Our data show that *Enterobacteriaceae* that commonly infect the gut of mosquitoes  
316 have the capacity to invade mosquito cells *in vitro* and *in vivo*. To gain access and  
317 persist in these cells, bacteria need to overcome the host immune response and the  
318 peritrophic matrix (PM). The PM, which acts as a physical barrier that separates  
319 epithelial cells from the gut lumen, is expressed constitutively in larvae and after a blood  
320 meal in adults. In a range of arthropods, genes associated with the PM are induced by  
321 bacteria [70] and in turn, the PM plays a pivotal role maintaining gut microbiome  
322 homeostasis, either by protecting bacteria from the innate immune response or  
323 restoring bacterial composition and abundance post blood meal [71]. While another

324 study has identified bacteria associating with the epithelium in *Anopheles* mosquitoes  
325 [72] our finding of intracellular bacteria residing within the midgut epithelium of larvae  
326 and adults indicates the PM is not completely effective at inhibiting microbiota or that  
327 bacteria invade these cells before the PM has established. Alternatively, bacteria may  
328 produce enzymes that degrade the PM in a similar fashion to malaria parasites that  
329 express chitinases [73].

330

331 In *Drosophila*, ingested *Serratia* (Db11) invaded the midgut epithelium in flies with an  
332 impaired IMD pathway, but not wild type flies. However, this infection reduces survival  
333 [30]. Similarly, fungal infection of *Anopheles* mosquitoes enables gut bacteria to  
334 translocate to the hemolymph leading to systemic infection [29]. Similar to the  
335 observations in *Drosophila* [30], we saw intracellular bacteria infrequently in the  
336 mosquito gut, suggesting there were intrinsic factors limiting the systemic infection.  
337 Innate immunity may be responsible for maintaining homeostasis, which would be  
338 consistent with our gene expression data, or alternatively, these mutualistic bacteria  
339 may exploit similar molecular processes as their pathogenic counterparts to overcome  
340 host immune pathways [74]. The intracellular lifestyle of bacteria and their ability to  
341 egress from cells likely facilitates microbial persistence in these holometabolous insects.  
342 Our finding of intracellular bacteria in the malpighian tubules further supports this theory  
343 as bacteria residing within this tissue are known to be transstadially transmitted [4].

344

345 **Conclusions**



346 In conclusion, we have shown through various *in vitro* and *in vivo* data that symbiotic  
347 *Enterobacteriaceae* can invade and replicate intracellularly in mosquito cells. Bacterial  
348 invasion is mediated by host actin filaments and beta-integrin receptors. Intracellular  
349 bacteria dramatically upregulate host IMD and Toll immune pathways and substantially  
350 reduce ZIKV density in cells. These data enhance our understanding of host-microbe  
351 interactions in mosquitoes and point to a possible mechanism by which bacteria, which  
352 are commonly associated with the midgut, could infect other tissues within mosquitoes.

353

#### 354 **Material and Methods.**

355 **Ethics statement:** ZIKV, which was originally isolated from an *Ae. aegypti* mosquito  
356 (Chiapas State, Mexico), was obtained from the World Reference Center for Emerging  
357 Viruses and Arboviruses at the University of Texas Medical Branch (Galveston, TX).  
358 Experimental work with the virus was approved by the University of Texas Medical  
359 Branch Institutional Biosafety Committee (reference number 2016055).

360

361 **Isolation of bacteria from mosquitoes:** Lab reared *Ae. albopictus* mosquitoes were  
362 collected and surface sterilized before homogenized in 500  $\mu$ l of 1X PBS. Serial dilution  
363 of homogenates was plated on LB agar plate to obtain isolated colonies. The single  
364 colonies were picked, grown in LB medium before isolating genomic DNA. The 16S  
365 rDNA PCR was performed as described previously [75] and the PCR product was  
366 Sanger sequenced to identify the bacterial species. To further classify the gut-  
367 associated bacteria we completed multilocus sequence typing (MLST) as described  
368 previously [11, 76]. The MLST sequences were aligned, concatenated and a maximum

369 likelihood tree under the LG model and rapid bootstrap was constructed using Seaview  
370 [77] (Fig. S6). The sequences have been deposited under accession numbers XXXX.

371

372 **Bacterial growth and cell culture:** Two bacterial isolates were grown in LB medium at  
373 37°C. The overnight culture was appropriately diluted in Schneider's media (Gibco) to  
374 obtain the MOI of 10 before the infection. The mosquito cell lines were maintained in  
375 their respective medium at 28 °C. The *Ae. aegypti* cell line Aag2 [78] and Sua5B cells  
376 were maintained in *Drosophila* Schneider's medium (Gibco) supplemented with 20%  
377 FBS (Denville Scientific) and 1% penicillin/streptomycin (P/S; 100 Units/mL and 100  
378 µg/mL respectively), RML-12 cells were maintained in Leibovitz' (L15) medium (Gibco)  
379 containing 20% FBS and 10% tryptose phosphate broth. Vero cells (CCL-81) were  
380 purchased from the American Type Culture Collection (Bethesda, MD, USA) and  
381 maintained in DMEM supplemented with 5% FBS and 1% P/S (100 Units/mL and 100  
382 µg/mL respectively) at 37 °C with 5% CO<sub>2</sub>.

383

384 **Gentamicin invasion assay:** The gentamicin invasion assay was performed as  
385 described elsewhere with minor alterations [33]. Aag2 cells were seeded at the density  
386 of  $1 \times 10^5$ /well in 24-well plate 48h prior to infection. On the day of infection, cells were  
387 washed in Schneider's media (Gibco) and infected with 500 µl of bacterial suspension.  
388 After incubating for 1h at 28 °C, bacteria were removed, and cells were washed once  
389 with Schneider's medium and incubated with 200 µg/ml gentamicin for additional 1h to  
390 kill extracellular bacteria. The invaded bacteria were recovered after washing the cells

391 twice with Schneider's media and lysing them in 500  $\mu$ l of 1X PBS containing 0.05%  
392 Triton X-100.

393

394 **Fluorescence and Transmission electron microscopy:** In order to assess the  
395 invasion of symbionts fluorescent microscopy and TEM was performed on the Aag2  
396 cells after allowing bacteria to invade. The bacteria were transformed with mCherry  
397 expressing plasmid pRAM18dRGA-mCherry, which is a modified version of  
398 pRAM18dRGA[MCS] [41]. Aag2 cells were fixed with 1% PFA (Electron Microscopy  
399 Sciences, Hartfield, PA) for 30 min and permeabilized in 1X PBS+0.01 % Triton X-100  
400 (Fischer Scientific) for 20 min following staining with Atto 488 Phalloidin (Sigma) as per  
401 manufacturers recommendations. The cell nuclei were stained with DAPI after washing  
402 the slides in 1X PBS. The slides were stored in Prolong-Antifade (Invitrogen). The  
403 samples were observed using the Revolve-FL epifluorescence microscope (ECHOLAB).  
404 For TEM, insect cells were fixed in fixative (2.5% formaldehyde, 0.1% glutaraldehyde,  
405 0.03% picric acid, 0.03%  $\text{CaCl}_2$  and 0.05 M cacodylate buffer at pH 7.3) and post fixed  
406 in 1% osmium tetroxide for 1 h, stained *en bloc* in 2% aqueous uranyl acetate at 60  $^{\circ}\text{C}$   
407 for 20 min, dehydrated in a graded series of ethanol concentrations, and embedded in  
408 epoxy resin, Poly/Bed 812. Ultrathin sections were cut on a Leica EM UC7 (Leica  
409 Microsystems, Buffalo Grove, IL), placed on Formvar-carbon copper 200 mesh grids,  
410 stained with lead citrate and examined in a Philips (FEI) CM-100 electron microscope at  
411 60 kV. To assess the *in vivo* invasion in mosquito larvae and adults, guts were  
412 dissected after surface sterilization in 1X PBS and then the tissue was fixed in fixative  
413 (2.5% glutaraldehyde and 2% paraformaldehyde buffered with 0.1 M sodium

414 cacodylate) for 2 hours and post fixed in 1% osmium tetroxide for 1 h at room  
415 temperature. Then samples were dehydrated in a graded series of ethanol  
416 concentrations, and embedded in epoxy resin, Epon 812. The sections were prepared  
417 as described above and imaged in a Tecnai Spirit (FEI) transmission electron  
418 microscope at 80 kV. For Confocal Laser Scanning Microscopy, tissue samples were  
419 fixed in 1% PFA in 1X PBS for 30 min, then permeabilized with 0.01% Triton X-100 in 1X  
420 PBS for 20 min before staining with SiR-actin Kit (Spirochrome AG, Switzerland) for 1  
421 hour and DAPI (Applied Biosystems) for 15 min. Then tissue samples were embedded  
422 in 1% low-melting agarose with SlowFade Diamond mounting solution (Molecular  
423 Probes). Samples were imaged and 3D-reconstructed (1.3 mm sections) using a Zeiss  
424 LSM-800 and were analysed in Zen 3.0 (Zeiss) and Fiji (ImageJ).

425

426 **Intracellular replication of *Cedecea neteri*:** To assess the replication of bacteria  
427 inside the host cells as well as in the medium, the Aag2 cells inoculated with *C. neteri*  
428 were incubated with or without gentamicin for 8h at 28 °C. Every two hours, the  
429 supernatant was collected and serial dilutions were plated on LB agar plate to  
430 enumerate the bacterial quantity in the medium. The cells were washed two times with  
431 Schneider's medium before plating on agar plate.

432

433 **Host cytoskeleton and Janus Kinase in *Cedecea neteri* invasion:** The gentamicin  
434 invasion assay was performed in the presence of actin and Janus kinase (JAK)  
435 inhibitors. The assay was performed by pre-incubating Aag2 cells in presence of 10 or  
436 20 µg/ml of Cytochalasin D (Sigma) and 30 or 60 µg/ml of Sp600125 (Sigma) for 1 hr.

437 The gentamicin invasion assay was performed as described above with the addition of  
438 each specific drug. A 60 µg/ml of DMSO treatment was used as a control.

439

440 **RNAi mediated integrin gene silencing in Aag2 cells:** In order to assess the role of  
441 host integrin receptors in the invasion of *C. neteri*, the integrin alpha and beta receptors  
442 were depleted using RNAi. dsRNA was designed for AAEL001829 and AAEL014660  
443 using E-RNAi [79] and amplified using primers with flanking T7 promoter sequence  
444 using *Ae. aegypti* cDNA as a template. dsRNA was synthesized using the T7  
445 megascript kit (Ambion). The primers are listed in the Table S1. dsDNA against GFP  
446 was used as control. Aag2 cells were transfected with 0.5 µg of each dsRNA using  
447 Lipofectamine™ RNAiMAX (Life Technologies) 48hrs prior to bacterial infection and the  
448 gentamicin invasion assay.

449

450 **RT-qPCR analysis:** Total RNA was isolated from Aag2 cells and reverse transcribed  
451 using the amfiRivert cDNA synthesis Platinum master mix (GenDepot, Barker, TX, USA)  
452 containing a mixture of oligo(dT)18 and random hexamers. Real-time quantification was  
453 performed in a StepOnePlus instrument (Applied Biosystems, Foster City, CA) in a 10 µl  
454 reaction mixture containing 10-20 ng cDNA template, 1X PowerUp SYBR green master  
455 mix (Applied Biosystems), and 1 µM (each) primer. The analysis was performed using  
456 the threshold cycle ( $\Delta\Delta$  CT) (Livak) method [80]. Four independent biological replicates  
457 were conducted, and all PCRs were performed in duplicate. In order to assess the  
458 expression of innate immune genes, the invasion assay was performed as described  
459 earlier and post 24-hr invasion cells were harvested to isolate RNA, followed by cDNA

460 synthesis and RT-qPCR for specific genes. The ribosomal protein S7 gene [81] was  
461 used for normalization of cDNA templates. Primer sequences are listed in Table S1.

462

463 ***In vitro* vector competence of ZIKV in Aag2 cells:** The assay was performed in order  
464 to assess the how intracellular bacteria modulate ZIKV infection *in vitro*. After the  
465 gentamicin invasion assay with *C. neteri* at an MOI of 1:1, 1:2, 1:5 and 1:10. After 24  
466 hrs, the supernatant was removed, and cells were washed twice with 1x PBS before  
467 infecting with ZIKV (Mex 1-7 strain) [82] at an MOI of 1:0.1. After 4 days, supernatant  
468 was collected and ZIKV was quantified by focus forming assay [82]. The experiment  
469 was repeated three times.

470 **Gnotobiotic rearing and *in vivo* invasion in mosquitoes:** *Ae. aegypti* gnotobiotic  
471 larvae were generated as previously described [83]. To synchronize hatching, sterile  
472 eggs were transferred to a conical flask and placed under a vacuum for 45 min. To  
473 verify sterility, larval water was plated on non-selective LB agar plates. Twenty L1 larvae  
474 were transferred to a T75 tissue culture flask and inoculated with transgenic symbionts  
475 possessing the pRAM18dRGA-mCherry at  $1 \times 10^7$ . Bacterial cultures were quantified with  
476 a spectrophotometer (DeNovix DS-11, DeNovix) and validated by plating and  
477 determining colony forming units. L1 larvae grown without bacteria were used as  
478 contamination control, and these mosquitoes did not reach pupation [83]. To feed  
479 mosquitoes, ground fish food pellets were sterilized by autoclaving and then mixed with  
480 sterile water. 60  $\mu$ l of fish food (1  $\mu$ g/ $\mu$ l) was fed to larvae on alternative days.

481

482 **Acknowledgements.**

483 We would like to thank the UTMB insectary core for providing the lab mosquitoes. GLH  
484 is supported by NIH grants (R21AI138074, R21AI124452 and R21AI129507), the  
485 Wolfson Foundation and Royal Society (RSWF\R1\180013), the John S. Dunn  
486 Foundation Collaborative Research Award, and the Centers for Disease Control and  
487 Prevention (Cooperative Agreement Number U01CK000512). The paper contents are  
488 solely the responsibility of the authors and do not necessarily represent the official  
489 views of the Centers for Disease Control and Prevention or the Department of Health  
490 and Human Services. This work was also supported by a James W. McLaughlin  
491 postdoctoral fellowship at the University of Texas Medical Branch to SH and a NIH T32  
492 fellowship (2T32AI007526) to MAS and Anti-VeC AV/PP0021//1 to AAS. Microscopy  
493 core facility at NYBC was supported by NYBC intramural fund. Confocal imaging  
494 facilities were funded by a Wellcome Trust Multi-User Equipment Grant  
495 (104936/Z/14/Z).

496

497

498 **Author Contributions**

499 SH and GLH designed the experiments. SH, DV, ACS, MAS, and VLP completed the  
500 experiments. SH, DV, VLP, AKC, and GLH undertook analysis. SH, AKC, AAS, and  
501 GLH wrote and edited the manuscript and all authors agreed to the final version. GLH  
502 acquired the funding and supervised the work.

503



504 **Figure legends**

505 **Figure 1. Invasion of symbiotic bacteria into mosquito cells.** The gentamicin  
506 invasion assay was used to examine the invasive capacity of symbiotic  
507 *Enterobacteriaceae* bacteria isolated from *Aedes* mosquitoes (A). Non-invasive *E. coli*  
508 was used as negative control. *E. coli* expressing the *Yersinia inv* (*Ypinv*) gene was used  
509 as a positive control. The assay was repeated twice. Fluorescent and transmission  
510 electron microscopy was used to visualize intracellular bacteria (B). Bacteria expressed  
511 mCherry fluorescent protein (red), actin filaments were stained with Phalloidin (green)  
512 and DNA with DAPI (blue). Arrowheads in the TEM images indicate vacuoles containing  
513 bacteria. Scale bar is 500 nm. Density (C) and time dependent (D) invasion of *C. neteri*  
514 in Aag2 cells. The density dependent invasion assay (C) was replicated twice. The time  
515 dependent invasion assay was done at host cell: bacterial density of 1:10 (N=4). *C.*  
516 *neteri* invasion in *Aedes aegypti* (Aag2 and RML-12 ) and *Anopheles gambiae* (Sua5B)  
517 (E). The assay was repeated twice. Letters indicate significant differences ( $p < 0.05$ )  
518 determined by a One-Way ANOVA with a Tukey's multiple comparison test.

519

520 **Figure 2. Intracellular replication and egression of *C. neteri* in Aag2 cells.** TEM of  
521 Aag2 cells containing invaded *C. neteri* replicating inside Aag2 cell (A). Arrow indicates  
522 the dividing bacterial cell. Bacterial titer in cells (B) or in the cell culture media (C) in the  
523 presence and absence of gentamicin. The significance between the gentamicin and  
524 non-treated samples at different time post invasion was analyzed by Unpaired t test.  
525 Five replicates were used at each time point.

526

527 **Figure 3. The role of host cytoskeletal proteins and receptors in the *C. neteri***  
528 **invasion.** Invasion of *C. neteri* in the presence of inhibitors of actin polymerisation (Cyt  
529 D) and phagocytosis (SP600125 [Sp]) (A). DMSO was used as control to assess its  
530 cytotoxic effect on the cells. *C. neteri* invasion after silencing of the beta- (B) and alpha-  
531 (C) integrins. The experiments were repeated twice. Letters indicate significant  
532 differences ( $p < 0.05$ ) determined by a One-Way ANOVA with a Tukey's multiple  
533 comparison test.

534

535 **Figure 4. Intracellular bacteria reduces ZIKV titer in *Ae. aegypti* cells.** ZIKV  
536 infection at 2 (A) and 4 (B) days post invasion compared to an uninfected control. ZIKV  
537 infection in *C. neteri* or *Serratia* sp. infected cells (C). The effect of bacterial density on  
538 ZIKV infection (D). *C. neteri* and *E. coli* were inoculated onto cells using the gentamicin  
539 invasion assay at increasing MOIs. For the *C. neteri* 1:2, 1:5, and 1:10 and *E. coli* 1:10  
540 treatments, no ZIKV was recovered from cells. For A, B and D significance was  
541 determined using unpaired t-test, while for C, significance was calculated by one-way  
542 ANNOVA with Tukey's multiple comparison test.

543

544 **Figure 5. Intracellular *C. neteri* upregulates mosquito Toll and IMD innate immune**  
545 **pathways.** Gene expression analysis of the NF- $\kappa$ B transcriptional activators (A) and the  
546 negative regulators (B) of the Toll, IMD and JAK-STAT pathways as well as  
547 downstream effector molecules (C). Gene expression was measured 24 hr post *C.*  
548 *neteri* invasion in Aag2 cells. Gene expression of the NF- $\kappa$ B transcriptional activators  
549 (D) and the negative regulators (E) in cells co-infected with *C. neteri* or *Serratia* sp. and

550 ZIKV. 24 hours post bacterial infection cells were infected with ZIKV. Samples were  
551 collected 4 days post ZIKV infection for qPCR analysis. The experiment was repeated  
552 twice. Letters indicate significant differences ( $p < 0.05$ ) determined by a One-Way  
553 ANOVA with a Tukey's multiple comparison test.

554

555 **Figure 6. Intracellular localization of *Cedecea* and *Serratia* in mosquito tissues.**

556 TEM micrographs of *Serratia* sp. (Sm) accumulated in the gut lumen and associated  
557 with the microvilli of the gut epithelium in mono-axenically infected *Ae. aegypti* adults  
558 (A). Magnified image of bacteria attaching to microvilli (MV) (B), and bacteria in the  
559 process of entering or exiting the gut epithelia (purple and green insert). (B) Intracellular  
560 *C. neteri* (Cn) in the larval gut mono-axenically infected *Ae. aegypti*. Mitochondria (M)  
561 and nucleus (N). Yellow and blue inserts show larger view of bacteria from B. CLSM  
562 evidence of the intracellular localization of *C. neteri* in the adult mosquito gut and  
563 Malpighian tubules (C). Bright field (left) and maximum intensity projection (right) of  
564 tissues 3D-reconstructed from a series of Z-stacks merging mosquito actin (white),  
565 mCherry-expressing *C. neteri* (yellow) and DAPI-stained DNA (magenta). Two  
566 representative XZ and YZ orthogonal views (OV1-4) of the stacks are shown for each  
567 tissue on the sides, and the identity of intracellular bacteria examples is noted with  
568 colored squares. On the right, the plots coloured according to the identity of the  
569 corresponding bacterium, show the co-localization of the actin signal (gray) with the  
570 mCherry bacteria (yellow). Scale bars are 50  $\mu\text{m}$ .

571

572

573 **Supplementary figure legends**

574 **Figure S1. Gentamicin invasion assay in different cell lines.** Invasion of *E. coli* and  
575 *E. coli* BL21 expressing the *Yersinia invasion* gene (*Ypinv*) in different cell lines. The  
576 assay was done in Aag2 (*Aedes aegypti*), Sua5B (*Anopheles gambiae*) and Vero  
577 (Monkey kidney cells). The assay was done twice. The statistical significance was  
578 determined using an Unpaired t-test.

579

580 **Figure S2. Flourscent microscopy of bacteria in Aag2 cells.** Merged and separate  
581 channels – blue (DAPI), green (actin filaments stained with Phalloidin), red (bacteria  
582 expressing mCherry). Scale bars are 70  $\mu\text{m}$ .

583

584 **Figure S3. Effect of intracellular bacteria on the cell viability.** Aag2 cell numbers at  
585 different times post invasion with *C. neteri*. Cells were supplement with gentamicin (200  
586  $\mu\text{g/ml}$ ) or cultured in the absence of antibiotic.

587

588 **Figure S4. Validation of gene silencing in cells.** RT-qPCR analysis of beta (A) and  
589 alpha (B) integrin gene expression 24 hours post transfection of dsRNA. dsRNAs  
590 targetting GFP were used as the negative control. The experiment was repeated twice.  
591 The statistical significance was determined using an Unpaired t-test.

592

593 **Figure S5. CLSM analyses of infected adult gut and Malpighian tubule.** Maximum  
594 intensity projection of tissues 3D-reconstructed from a series of Z-stacks merging  
595 mosquito actin (white), mCherry-expressing *Cedecea* (yellow) and DAPI-stained DNA

596 (magenta). Several XZ and YZ orthogonal views (OV) of the stacks are shown for each  
597 tissue on the sides. Scale bars are 50  $\mu\text{m}$ .

598

599 **Figure S6.** Phylogenetic analysis of multilocus sequence typing as described in [76]  
600 shows the phylogenetic position of *Serratia sp.* Alb1 (in red; this study) and *C. neteri*  
601 Alb1 (in blue; [11]). The tree analysis was performed using PhyML under the general  
602 time-reversible model with rapid aLRT bootstrap support as implemented as default in  
603 seaview (v4.7; [77]). The *Serratia sp.* Alb1 sequences were submitted to NCBI under  
604 accession numbers XXX (ropB), XXX (gyrB), XXX (atpD) and XXX (infB). [Accession  
605 numbers requested and will be updated in revision process as soon as available].

606

607 **Supporting files.**

608 **Supporting file S1.** Tree file, including all support values.

609

610 **Supplementary table legends.**

611 **Table S1.** Primer sequences used in this study

612

613 **Supplementary video legends.**

614 **Video S1.** Series of Z-stacks of an adult infected gut by CLSM.

615

616 **Video S2.** Series of Z-stacks of an adult infected Malpighian tubule by CLSM.

617

618 **Reference:**

619

620 1. Duguma D, Hall MW, Smartt CT, Neufeld JD. Effects of Organic Amendments on  
621 Microbiota Associated with the *Culex nigripalpus* Mosquito Vector of the Saint Louis  
622 Encephalitis and West Nile Viruses. *mSphere*. 2017;2(1). Epub 2017/02/09. doi:  
623 10.1128/mSphere.00387-16.

624 2. Dada N, Jumas-Bilak E, Manguin S, Seidu R, Stenström T-A, Overgaard HJ.  
625 Comparative assessment of the bacterial communities associated with *Aedes aegypti*  
626 larvae and water from domestic water storage containers. *Parasites & Vectors*.  
627 2014;7(1):391. doi: 10.1186/1756-3305-7-391.

628 3. Gusmao DS, Santos AV, Marini DC, Russo Ede S, Peixoto AM, Bacci Junior M,  
629 et al. First isolation of microorganisms from the gut diverticulum of *Aedes aegypti*  
630 (Diptera: Culicidae): new perspectives for an insect-bacteria association. *Mem Inst*  
631 *Oswaldo Cruz*. 2007;102(8):919-24. Epub 2008/01/23. doi: 10.1590/s0074-  
632 02762007000800005.

633 4. Chavshin AR, Oshaghi MA, Vatandoost H, Yakhchali B, Zarenejad F, Terenius  
634 O. Malpighian tubules are important determinants of *Pseudomonas transstadial*  
635 transmission and longtime persistence in *Anopheles stephensi*. *Parasites & Vectors*.  
636 2015;8(1):36. doi: 10.1186/s13071-015-0635-6.

637 5. Chen S, Bagdasarian M, Walker ED. *Elizabethkingia anophelis*: Molecular  
638 Manipulation and Interactions with Mosquito Hosts. *Applied and Environmental*  
639 *Microbiology*. 2015;81(6):2233. doi: 10.1128/AEM.03733-14.

- 640 6. Alonso DP, Mancini MV, Damiani C, Cappelli A, Ricci I, Alvarez MVN, et al.  
641 Genome Reduction in the Mosquito Symbiont *Asaia*. *Genome Biol Evol.* 2019;11(1):1-  
642 10. Epub 2018/11/27. doi: 10.1093/gbe/evy255.
- 643 7. Duguma D, Hall MW, Smartt CT, Debboun M, Neufeld JD. Microbiota variations  
644 in *Culex nigripalpus* disease vector mosquito of West Nile virus and Saint Louis  
645 Encephalitis from different geographic origins. *PeerJ.* 2019;6:e6168. Epub 2019/01/16.  
646 doi: 10.7717/peerj.6168.
- 647 8. Osei-Poku J, Mbogo CM, Palmer WJ, Jiggins FM. Deep sequencing reveals  
648 extensive variation in the gut microbiota of wild mosquitoes from Kenya. *Molecular*  
649 *Ecology.* 2012;21(20):5138-50. doi: 10.1111/j.1365-294X.2012.05759.x.
- 650 9. Muturi EJ, Ramirez JL, Rooney AP, Kim C-H. Comparative analysis of gut  
651 microbiota of mosquito communities in central Illinois. *PLoS Neglected Tropical*  
652 *Diseases.* 2017;11(2):e0005377-18. doi: 10.1371/journal.pntd.0005377.
- 653 10. Pei D, Jiang J, Yu W, Kukutla P, Uentillie A, Xu J. The *waaL* gene mutation  
654 compromised the inhabitation of *Enterobacter sp. Ag1* in the mosquito gut environment.  
655 *Parasites & Vectors.* 2015:1-10. doi: 10.1186/s13071-015-1049-1.
- 656 11. Hegde S, Nilyanimit P, Kozlova E, Anderson ER, Narra HP, Sahni SK, et al.  
657 CRISPR/Cas9-mediated gene deletion of the *ompA* gene in symbiotic *Cedecea neteri*  
658 impairs biofilm formation and reduces gut colonization of *Aedes aegypti* mosquitoes.  
659 *PLOS Neglected Tropical Diseases.* 2019;13(12):e0007883. doi:  
660 10.1371/journal.pntd.0007883.

- 661 12. Guegan M, Zouache K, Demichel C, Minard G, Tran Van V, Potier P, et al. The  
662 mosquito holobiont: fresh insight into mosquito-microbiota interactions. *Microbiome*.  
663 2018;6(1):49. Epub 2018/03/21. doi: 10.1186/s40168-018-0435-2.
- 664 13. Brady OJ, Godfray HC, Tatem AJ, Gething PW, Cohen JM, McKenzie FE, et al.  
665 Vectorial capacity and vector control: reconsidering sensitivity to parameters for malaria  
666 elimination. *Trans R Soc Trop Med Hyg*. 2016;110(2):107-17. Epub 2016/01/30. doi:  
667 10.1093/trstmh/trv113.
- 668 14. Hegde S, Rasgon JL, Hughes GL. The microbiome modulates arbovirus  
669 transmission in mosquitoes. *Current Opinion in Virology*. 2015;15:97-102. doi:  
670 10.1016/j.coviro.2015.08.011.
- 671 15. Caragata EP, Tikhe CV, Dimopoulos G. Curious entanglements: interactions  
672 between mosquitoes, their microbiota, and arboviruses. *Current Opinion in Virology*.  
673 2019;37:26-36. doi: <https://doi.org/10.1016/j.coviro.2019.05.005>.
- 674 16. Saldaña MA, Hegde S, Hughes GL. Microbial control of arthropod-borne disease.  
675 *Memórias do Instituto Oswaldo Cruz*. 2017;112(2):81-93. doi: 10.1590/0074-  
676 02760160373.
- 677 17. Ricci I, Damiani C, Capone A, DeFreece C, Rossi P, Favia G.  
678 Mosquito/microbiota interactions: from complex relationships to biotechnological  
679 perspectives. *Current Opinion in Microbiology*. 2012;15(3):278-84. doi:  
680 10.1016/j.mib.2012.03.004.
- 681 18. Berhanu A, Abera A, Nega D, Mekasha S, Fentaw S, Assefa A, et al. Isolation  
682 and identification of microflora from the midgut and salivary glands of Anopheles



- 683 species in malaria endemic areas of Ethiopia. *BMC Microbiol.* 2019;19(1):85. Epub  
684 2019/05/01. doi: 10.1186/s12866-019-1456-0.
- 685 19. Dickson LB, Ghozlane A, Volant S, Bouchier C, Ma L, Vega-Rua A, et al. Diverse  
686 laboratory colonies of *Aedes aegypti* harbor the same adult midgut bacterial  
687 microbiome. *Parasites & Vectors.* 2018;11(1):207. doi: 10.1186/s13071-018-  
688 2780-1.
- 689 20. Damiani C, Ricci I, Crotti E, Rossi P, Rizzi A, Scuppa P, et al. Paternal  
690 transmission of symbiotic bacteria in malaria vectors. *Current biology : CB.*  
691 2008;18(23):R1087-8. doi: 10.1016/j.cub.2008.10.040.
- 692 21. Sharma P, Sharma S, Maurya RK, Das De T, Thomas T, Lata S, et al. Salivary  
693 glands harbor more diverse microbial communities than gut in *Anopheles culicifacies*.  
694 *Parasites & Vectors.* 2014;7(1):235. doi: 10.1186/1756-3305-7-235.
- 695 22. Gimonneau G, Tchioffo MT, Abate L, Boissière A, Awono-Ambene PH, Nsango  
696 SE, et al. Composition of *Anopheles coluzzii* and *Anopheles gambiae* microbiota from  
697 larval to adult stages. *Infection, genetics and evolution : journal of molecular  
698 epidemiology and evolutionary genetics in infectious diseases.* 2014;28:715-24. doi:  
699 10.1016/j.meegid.2014.09.029.
- 700 23. Mancini MV, Damiani C, Accoti A, Tallarita M, Nunzi E, Cappelli A, et al.  
701 Estimating bacteria diversity in different organs of nine species of mosquito by next  
702 generation sequencing. *BMC Microbiol.* 2018;18(1):126. Epub 2018/10/06. doi:  
703 10.1186/s12866-018-1266-9.
- 704 24. Segata N, Baldini F, Pompon J, Garrett WS, Truong DT, Dabiré RK, et al. The  
705 reproductive tracts of two malaria vectors are populated by a core microbiome and by

- 706 gender- and swarm-enriched microbial biomarkers. *Scientific Reports*. 2016;6:24207.  
707 doi: 10.1038/srep24207.
- 708 25. Tchioffo MT, Boissiere A, Abate L, Nsango SE, Bayibeki AN, Awono-Ambene  
709 PH, et al. Dynamics of Bacterial Community Composition in the Malaria Mosquito's  
710 Epithelia. *Front Microbiol*. 2015;6:1500. Epub 2016/01/19. doi:  
711 10.3389/fmicb.2015.01500.
- 712 26. Koosha M, Vatandoost H, Karimian F, Choubdar N, Oshaghi MA. Delivery of a  
713 Genetically Marked *Serratia* AS1 to Medically Important Arthropods for Use in RNAi and  
714 Paratransgenic Control Strategies. *Microb Ecol*. 2018. Epub 2018/11/22. doi:  
715 10.1007/s00248-018-1289-7.
- 716 27. Wang S, Dos-Santos ALA, Huang W, Liu KC, Oshaghi MA, Wei G, et al. Driving  
717 mosquito refractoriness to *Plasmodium falciparum* with engineered symbiotic bacteria.  
718 *Science (New York, NY)*. 2017;357(6358):1399-402. doi: 10.1126/science.aan5478.
- 719 28. Damiani C, Ricci I, Crotti E, Rossi P, Rizzi A, Scuppa P, et al. Mosquito-Bacteria  
720 Symbiosis: The Case of *Anopheles gambiae* and *Asaia*. *Microb Ecol*. 2010;60(3):644-  
721 54. doi: 10.1007/s00248-010-9704-8.
- 722 29. Wei G, Lai Y, Wang G, Chen H, Li F, Wang S. Insect pathogenic fungus interacts  
723 with the gut microbiota to accelerate mosquito mortality. *Proceedings of the National*  
724 *Academy of Sciences of the United States of America*. 2017;114(23):5994-9. doi:  
725 10.1073/pnas.1703546114.
- 726 30. Nehme NT, Liégeois S, Kele B, Giammarinaro P, Pradel E, Hoffmann JA, et al. A  
727 model of bacterial intestinal infections in *Drosophila melanogaster*. 2007;3(11):e173.  
728 doi: 10.1371/journal.ppat.0030173.

- 729 31. Czuczman MA, Fattouh R, van Rijn JM, Canadien V, Osborne S, Muise AM, et  
730 al. *Listeria monocytogenes* exploits efferocytosis to promote cell-to-cell spread. *Nature*.  
731 2014;509(7499):230-4. Epub 2014/04/18. doi: 10.1038/nature13168.
- 732 32. Ribet D, Cossart P. How bacterial pathogens colonize their hosts and invade  
733 deeper tissues. *Microbes and infection*. 2015;17(3):173-83. doi:  
734 10.1016/j.micinf.2015.01.004.
- 735 33. Hegde S, Hegde S, Spargser J, Brunthaler R, Rosengarten R, Chopra-  
736 Dewasthaly R. In vitro and in vivo cell invasion and systemic spreading of *Mycoplasma*  
737 *agalactiae* in the sheep infection model. *International journal of medical microbiology :*  
738 *IJMM*. 2014;304(8):1024-31. doi: 10.1016/j.ijmm.2014.07.011.
- 739 34. Tchioffo MT, Abate L, Boissière A, Nsango SE, Gimonneau G, Berry A, et al. An  
740 epidemiologically successful *Escherichia coli* sequence type modulates *Plasmodium*  
741 *falciparum* infection in the mosquito midgut. *Infection, genetics and evolution : journal of*  
742 *molecular epidemiology and evolutionary genetics in infectious diseases*. 2016;43:22-  
743 30. doi: 10.1016/j.meegid.2016.05.002.
- 744 35. Elsinghorst EA. Measurement of invasion by gentamicin resistance. *Methods*  
745 *Enzymol*. 1994;236:405-20. Epub 1994/01/01.
- 746 36. Isberg RR, Falkow S. A single genetic locus encoded by *Yersinia*  
747 *pseudotuberculosis* permits invasion of cultured animal cells by *Escherichia coli* K-12.  
748 *Nature*. 1985;317(6034):262-4.
- 749 37. Isberg RR, Voorhis DL, Falkow S. Identification of invasins: a protein that allows  
750 enteric bacteria to penetrate cultured mammalian cells. *Cell*. 1987;50(5):769-78. Epub  
751 1987/08/28. doi: 10.1016/0092-8674(87)90335-7.

- 752 38. Dersch P, Isberg RR. A region of the *Yersinia pseudotuberculosis* invasin protein  
753 enhances integrin-mediated uptake into mammalian cells and promotes self-  
754 association. *The EMBO Journal*. 1999;18(5):1199-213. doi: 10.1093/emboj/18.5.1199.
- 755 39. Trujillo-Ocampo A, Cazares-Raga FE, Del Angel RM, Medina-Ramirez F,  
756 Santos-Argumedo L, Rodriguez MH, et al. Participation of 14-3-3epsilon and 14-3-3zeta  
757 proteins in the phagocytosis, component of cellular immune response, in *Aedes*  
758 mosquito cell lines. *Parasit Vectors*. 2017;10(1):362. Epub 2017/08/03. doi:  
759 10.1186/s13071-017-2267-5.
- 760 40. Dimopoulos G, Müller HM, Levashina EA, Kafatos FC. Innate immune defense  
761 against malaria infection in the mosquito. *Current Opinion in Immunology*.  
762 2001;13(1):79-88.
- 763 41. Hegde S, Khanipov K, Albayrak L, Golovko G, Pimenova M, Saldaña MA, et al.  
764 Microbiome interaction networks and community structure from laboratory-reared and  
765 field-collected *Aedes aegypti*, *Aedes albopictus*, and *Culex quinquefasciatus* mosquito  
766 vectors. *Frontiers in Microbiology*. 2018;9:715. doi: 10.3389/fmicb.2018.02160.
- 767 42. Gupta L, Molina-Cruz A, Kumar S, Rodrigues J, Dixit R, Zamora RE, et al. The  
768 STAT pathway mediates late-phase immunity against *Plasmodium* in the mosquito  
769 *Anopheles gambiae*. *Cell Host & Microbe*. 2009;5(5):498-507. doi:  
770 10.1016/j.chom.2009.04.003.
- 771 43. Wright JD, Barr AR. The ultrastructure and symbiotic relationships of *Wolbachia*  
772 of mosquitoes of the *Aedes scutellaris* group. *Journal of Ultrastructure Research*.  
773 1980;72(1):52-64. doi: [https://doi.org/10.1016/S0022-5320\(80\)90135-5](https://doi.org/10.1016/S0022-5320(80)90135-5).

- 774 44. Fattouh N, Cazevieille C, Landmann F. Wolbachia endosymbionts subvert the  
775 endoplasmic reticulum to acquire host membranes without triggering ER stress. PLOS  
776 Neglected Tropical Diseases. 2019;13(3):e0007218. doi: 10.1371/journal.pntd.0007218.
- 777 45. Traven A, Naderer T. Microbial egress: a hitchhiker guide to freedom. PLOS  
778 Pathogens. 2014;10(7):e1004201. doi: 10.1371/journal.ppat.1004201.
- 779 46. Flieger A, Frischknecht F, Hacker G, Hornef MW, Pradel G. Pathways of host cell  
780 exit by intracellular pathogens. Microb Cell. 2018;5(12):525-44. Epub 2018/12/12. doi:  
781 10.15698/mic2018.12.659.
- 782 47. Haglund CM, Welch MD. Pathogens and polymers: microbe-host interactions  
783 illuminate the cytoskeleton. J Cell Biol. 2011;195(1):7-17. Epub 2011/10/05. doi:  
784 10.1083/jcb.201103148.
- 785 48. Hybiske K, Stephens R. Cellular Exit Strategies of Intracellular Bacteria.  
786 Microbiol Spectr. 2015;3(6). Epub 2016/06/24. doi: 10.1128/microbiolspec.VMBF-0002-  
787 2014.
- 788 49. Fukumatsu M, Ogawa M, Arakawa S, Suzuki M, Nakayama K, Shimizu S, et al.  
789 Shigella targets epithelial tricellular junctions and uses a noncanonical clathrin-  
790 dependent endocytic pathway to spread between cells. Cell Host & Microbe.  
791 2012;11(4):325-36. doi: 10.1016/j.chom.2012.03.001.
- 792 50. Casella JF, Flanagan MD, Lin S. Cytochalasin D inhibits actin polymerization and  
793 induces depolymerization of actin filaments formed during platelet shape change.  
794 Nature. 1981;293(5830):302-5. Epub 1981/09/24. doi: 10.1038/293302a0.
- 795 51. Mizutani T, Kobayashi M, Eshita Y, Shirato K, Kimura T, Ako Y, et al.  
796 Involvement of the JNK-like protein of the Aedes albopictus mosquito cell line, C6/36, in

- 797 phagocytosis, endocytosis and infection of West Nile virus. *Insect Mol Biol.* 2003;12.  
798 doi: 10.1046/j.1365-2583.2003.00435.x.
- 799 52. Lin M, Kikuchi T, Brewer HM, Norbeck AD, Rikihisa Y. Global Proteomic Analysis  
800 of Two Tick-Borne Emerging Zoonotic Agents: *Anaplasma Phagocytophilum* and  
801 *Ehrlichia Chaffeensis*. *Frontiers in Microbiology.* 2011;2. doi:  
802 10.3389/fmicb.2011.00024.
- 803 53. Martinez JJ, Cossart P. Early signaling events involved in the entry of *Rickettsia*  
804 *conorii* into mammalian cells. *Journal Of Cell Science.* 2004;117(Pt 21):5097-106. doi:  
805 10.1242/jcs.01382.
- 806 54. Wesolowski J, Paumet F. Taking control: reorganization of the host cytoskeleton  
807 by *Chlamydia*. *F1000Research.* 2017;6:2058. doi: 10.12688/f1000research.12316.1.
- 808 55. Moita L, Vriend G, Mahairaki V, Louis C, Kafatos F. Integrins of *Anopheles*  
809 *gambiae* and a putative role of a new  $\beta$  integrin, BINT2, in phagocytosis of *E. coli*. *Insect*  
810 *Biochemistry and Molecular Biology.* 2006;36(4):282-90. doi:  
811 10.1016/j.ibmb.2006.01.004.
- 812 56. Eto DS, Jones TA, Sundsbak JL, Mulvey MA. Integrin-mediated host cell  
813 invasion by type 1-piliated uropathogenic *Escherichia coli*. *PLOS Pathogens.*  
814 2007;3(7):e100. doi: 10.1371/journal.ppat.0030100.
- 815 57. Wu J, Weening EH, Faske JB, Höök M, Skare JT. Invasion of Eukaryotic Cells by  
816 *Borrelia burgdorferi* Requires  $\beta$  1 Integrins and Src Kinase Activity. *Infection and*  
817 *Immunity.* 2011;79(3):1338-48. doi: 10.1128/IAI.01188-10.

- 818 58. Gillenius E, Urban CF. The adhesive protein invasin of *Yersinia*  
819 *pseudotuberculosis* induces neutrophil extracellular traps via  $\beta$ 1 integrins. *Microbes and*  
820 *infection*. 2015;17(5):327-36. doi: 10.1016/j.micinf.2014.12.014.
- 821 59. Miesen P, van Rij RP. Crossing the Mucosal Barrier: A Commensal Bacterium  
822 Gives Dengue Virus a Leg-Up in the Mosquito Midgut. *Cell Host Microbe*. 2019;25(1):1-  
823 2. Epub 2019/01/11. doi: 10.1016/j.chom.2018.12.009.
- 824 60. Coatsworth H, Caicedo PA, Van Rossum T, Ocampo CB, Lowenberger C. The  
825 Composition of Midgut Bacteria in *Aedes aegypti* (Diptera: Culicidae) That Are Naturally  
826 Susceptible or Refractory to Dengue Viruses. *Journal of Insect Science*. 2018;18(6).  
827 doi: 10.1093/jisesa/iey118.
- 828 61. Hegde S, Hegde S, Hegde S, Zimmermann M, Flöck M, Spargser J, et al.  
829 Simultaneous Identification of Potential Pathogenicity Factors of *Mycoplasma agalactiae*  
830 in the Natural Ovine Host by Negative Selection. *Infection and Immunity*.  
831 2015;83(7):2751-61. doi: 10.1128/IAI.00403-15.
- 832 62. Broderick NA. Friend, foe or food? Recognition and the role of antimicrobial  
833 peptides in gut immunity and *Drosophila*-microbe interactions. *Philosophical*  
834 *transactions of the Royal Society of London Series B, Biological sciences*.  
835 2016;371(1695):20150295. doi: 10.1098/rstb.2015.0295.
- 836 63. Buchon N, Broderick NA, Poidevin M, Pradervand S, Lemaitre B. *Drosophila*  
837 intestinal response to bacterial infection: activation of host defense and stem cell  
838 proliferation. *Cell Host & Microbe*. 2009;5(2):200-11. doi:  
839 10.1016/j.chom.2009.01.003.

- 840 64. Cheng G, Liu Y, Wang P, Xiao X. Mosquito Defense Strategies against Viral  
841 Infection. *Trends Parasitol.* 2016;32(3):177-86. Epub 2015/12/03. doi:  
842 10.1016/j.pt.2015.09.009.
- 843 65. Fragkoudis R, Attarzadeh-Yazdi G, Nash AA, Fazakerley JK, Kohl A. Advances  
844 in dissecting mosquito innate immune responses to arbovirus infection. *The Journal of*  
845 *general virology.* 2009;90(Pt 9):2061-72. doi: 10.1099/vir.0.013201-0.
- 846 66. Zhang X, Aksoy E, Girke T, Raikhel AS, Karginov FV. Transcriptome-wide  
847 microRNA and target dynamics in the fat body during the gonadotrophic cycle of *Aedes*  
848 *aegypti*. *Proceedings of the National Academy of Sciences of the United States of*  
849 *America.* 2017;114(10):E1895-E903. doi: 10.1073/pnas.1701474114.
- 850 67. Barletta AB, Nascimento-Silva MC, Talyuli OA, Oliveira JH, Pereira LO, Oliveira  
851 PL, et al. Microbiota activates IMD pathway and limits Sindbis infection in *Aedes*  
852 *aegypti*. *Parasit Vectors.* 2017;10(1):103. Epub 2017/02/25. doi: 10.1186/s13071-017-  
853 2040-9.
- 854 68. Kumar A, Srivastava P, Sirisena P, Dubey SK, Kumar R, Shrinet J, et al.  
855 Mosquito Innate Immunity. *Insects.* 2018;9(3). Epub 2018/08/12. doi:  
856 10.3390/insects9030095.
- 857 69. Friedrich N, Hagedorn M, Soldati-Favre D, Soldati T. Prison break: pathogens  
858 strategies to egress from host cells. *Microbiol Mol Biol Rev.* 2012;76(4):707-20. doi:  
859 10.1128/MMBR.00024-12.
- 860 70. Narasimhan S, Rajeevan N, Liu L, Zhao YO, Heisig J, Pan J, et al. Gut  
861 Microbiota of the Tick Vector *Ixodes scapularis* Modulate Colonization of the Lyme



- 862 Disease Spirochete. Cell Host & Microbe. 2014;15(1):58-71. doi:  
863 10.1016/j.chom.2013.12.001.
- 864 71. Rodgers FH, Gendrin M, Wyer CAS, Christophides GK. Microbiota-induced  
865 peritrophic matrix regulates midgut homeostasis and prevents systemic infection of  
866 malaria vector mosquitoes. PLOS Pathogens. 2017;13(5):e1006391. doi:  
867 10.1371/journal.ppat.1006391.
- 868 72. Gusmão DS, Santos AV, Marini DC, Bacci Jr M, Berbert-Molina MA, Lemos FJA.  
869 Culture-dependent and culture-independent characterization of microorganisms  
870 associated with *Aedes aegypti* (Diptera: Culicidae) (L.) and dynamics of bacterial  
871 colonization in the midgut. Acta Tropica. 2010;115(3):275-81. doi:  
872 10.1016/j.actatropica.2010.04.011.
- 873 73. Tsai YL, Hayward RE, Langer RC, Fidock DA, Vinetz JM. Disruption of  
874 *Plasmodium falciparum* Chitinase Markedly Impairs Parasite Invasion of Mosquito  
875 Midgut. Infection and Immunity. 2001;69(6):4048-54. doi: 10.1128/IAI.69.6.4048-  
876 4054.2001.
- 877 74. Goebel W, Gross R. Intracellular survival strategies of mutualistic and parasitic  
878 prokaryotes. Trends Microbiol. 2001;9(6):267-73. Epub 2001/06/08.
- 879 75. Kumar S, Molina-Cruz A, Gupta L, Rodrigues J, Barillas-Mury C. A  
880 peroxidase/dual oxidase system modulates midgut epithelial immunity in *Anopheles*  
881 *gambiae*. Science. 2010;327(5973):1644-8. doi: 10.1126/science.1184008.
- 882 76. Brady C, Cleenwerck I, Venter S, Coutinho T, De Vos P. Taxonomic evaluation  
883 of the genus *Enterobacter* based on multilocus sequence analysis (MLSA): Proposal to  
884 reclassify *E. nimipressuralis* and *E. amnigenus* into *Lelliottia* gen. nov. as *Lelliottia*

885 *nimipressuralis* comb. nov. and *Lelliottia amnigena* comb. nov., respectively, *E.*  
886 *gergoviae* and *E. pyrinus* into *Pluralibacter* gen. nov. as *Pluralibacter gergoviae* comb.  
887 nov. and *Pluralibacter pyrinus* comb. nov., respectively, *E. cowanii*, *E. radicincitans*, *E.*  
888 *oryzae* and *E. arachidis* into *Kosakonia* gen. nov. as *Kosakonia cowanii* comb. nov.,  
889 *Kosakonia radicincitans* comb. nov., *Kosakonia oryzae* comb. nov. and *Kosakonia*  
890 *arachidis* comb. nov., respectively, and *E. turicensis*, *E. helveticus* and *E. pulveris* into  
891 *Cronobacter* as *Cronobacter zurichensis* nom. nov., *Cronobacter helveticus* comb. nov.  
892 and *Cronobacter pulveris* comb. nov., respectively, and emended description of the  
893 genera *Enterobacter* and *Cronobacter*. *Systematic and Applied Microbiology*.  
894 2013;36(5):309-19. doi: <https://doi.org/10.1016/j.syapm.2013.03.005>.

895 77. Gouy M, Guindon S, Gascuel O. SeaView version 4: A multiplatform graphical  
896 user interface for sequence alignment and phylogenetic tree building. *Molecular biology*  
897 *and evolution*. 2010;27(2):221-4. Epub 2009/10/23. doi: 10.1093/molbev/msp259.

898 78. Peleg J. Growth of arboviruses in primary tissue culture of *Aedes aegypti*  
899 embryos. *Am J Trop Med Hyg*. 1968;17.

900 79. Horn T, Boutros M. E-RNAi: a web application for the multi-species design of  
901 RNAi reagents--2010 update. *Nucleic Acids Research*. 2010;38(Web Server  
902 issue):W332-9. doi: 10.1093/nar/gkq317.

903 80. Livak KJ, Schmittgen TD. Analysis of Relative Gene Expression Data Using  
904 Real-Time Quantitative PCR and the  $2^{-\Delta\Delta CT}$  Method. *Methods (San Diego, Calif)*.  
905 2001;25(4):402-8. doi: 10.1006/meth.2001.1262.

906 81. Isoe J, Collins J, Badgandi H, Day WA, Miesfeld RL. Defects in coatomer protein  
907 I (COPI) transport cause blood feeding-induced mortality in Yellow Fever mosquitoes.

908 Proceedings of the National Academy of Sciences of the United States of America.  
909 2011;108(24):E211-7. doi: 10.1073/pnas.1102637108.

910 82. Saldaña MA, Etebari K, Hart CE, Widen SG, Wood TG, Thangamani S, et al.  
911 Zika virus alters the microRNA expression profile and elicits an RNAi response in *Aedes*  
912 *aegypti* mosquitoes. PLoS Neglected Tropical Diseases. 2017;11(7):e0005760-18. doi:  
913 10.1371/journal.pntd.0005760.

914 83. Coon KL, Vogel KJ, Brown MR, Strand MR. Mosquitoes rely on their gut  
915 microbiota for development. Molecular Ecology. 2014;23(11):2727-39. doi:  
916 10.1111/mec.12771.

917

918

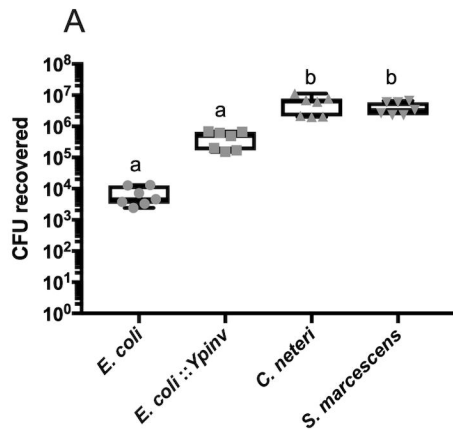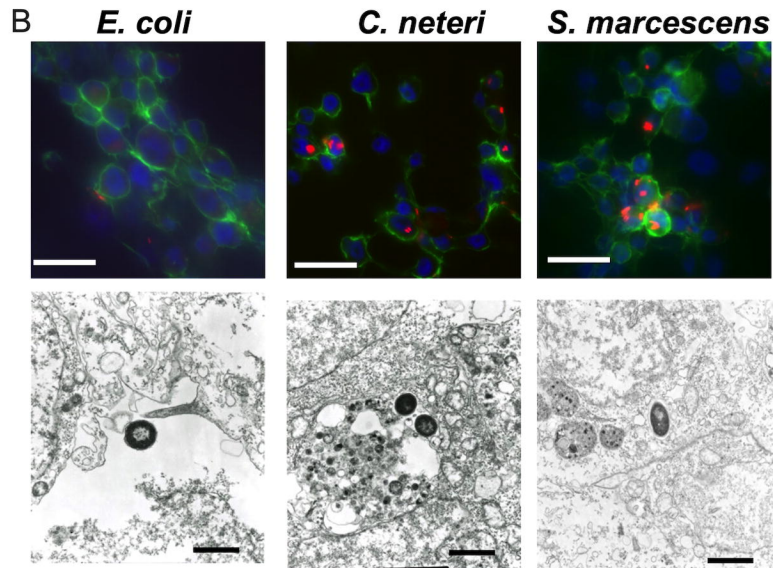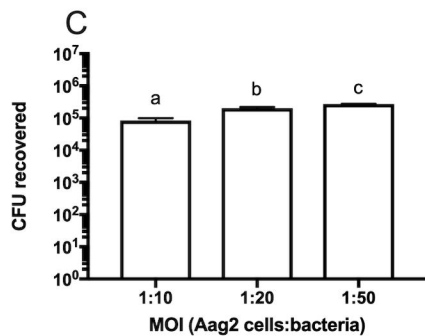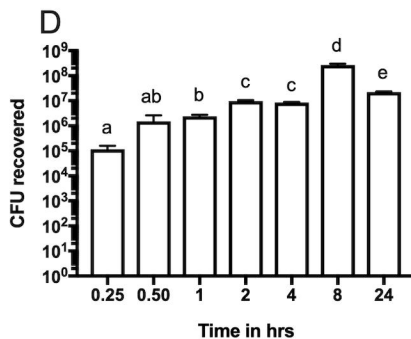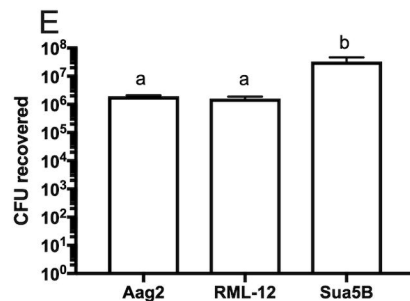

A

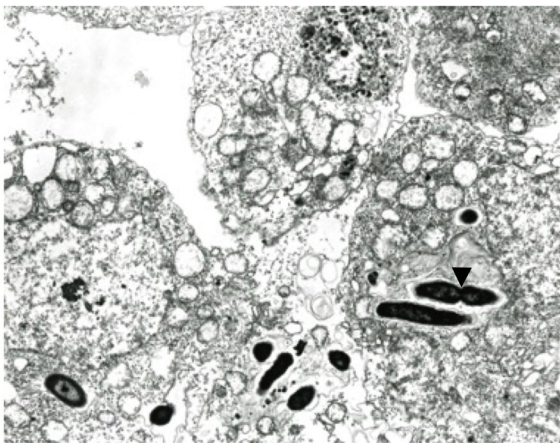

B

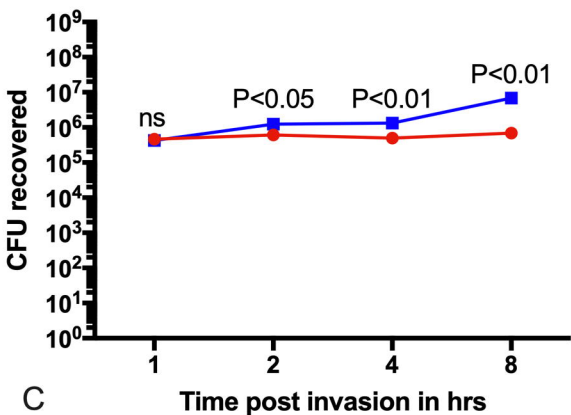

C

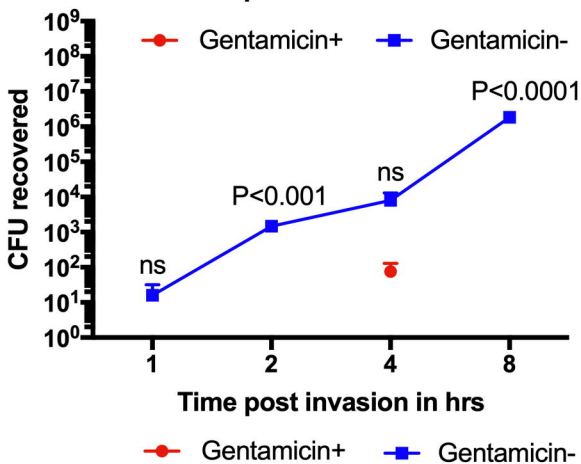

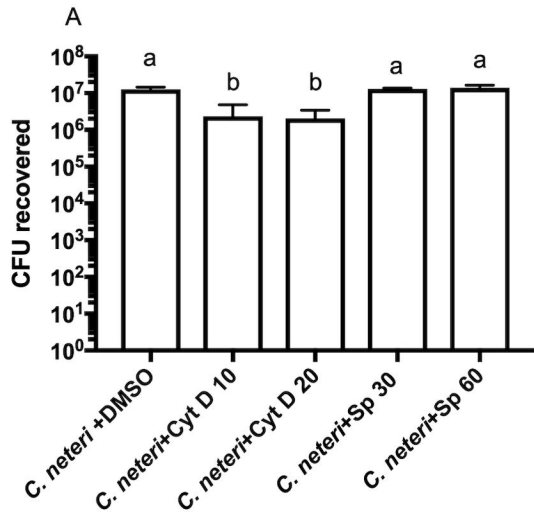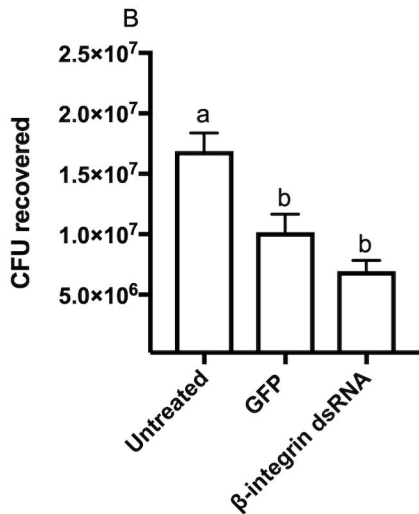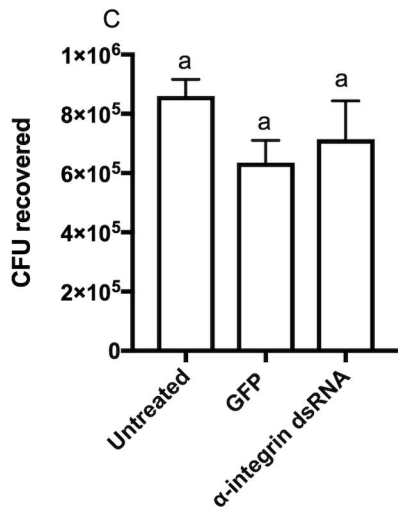

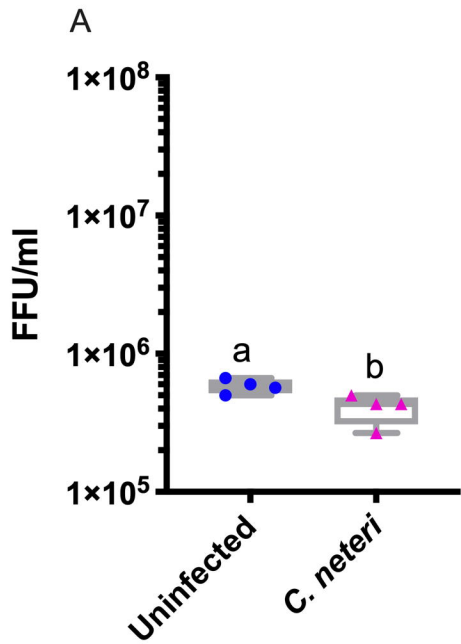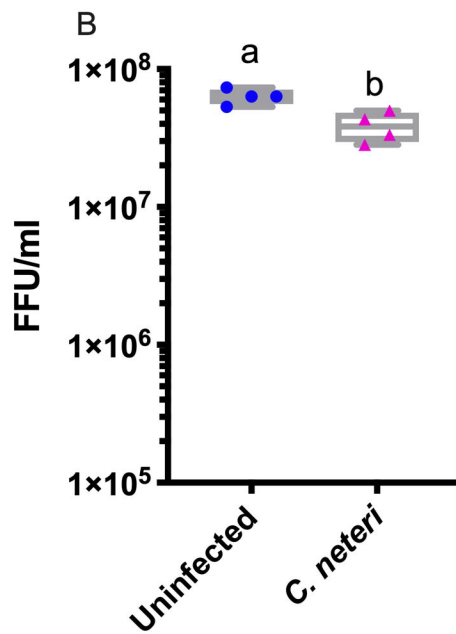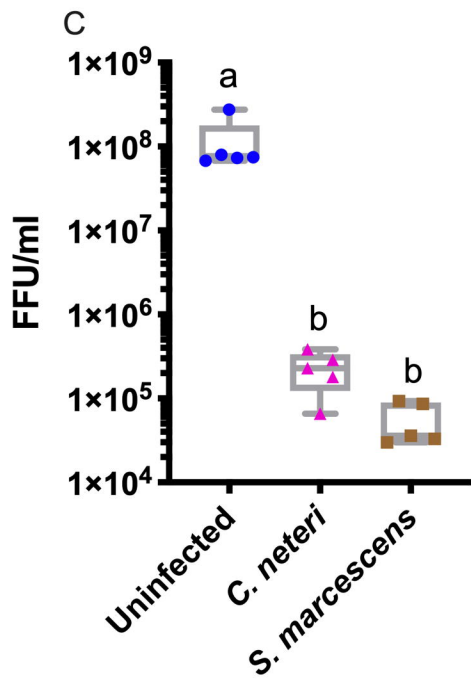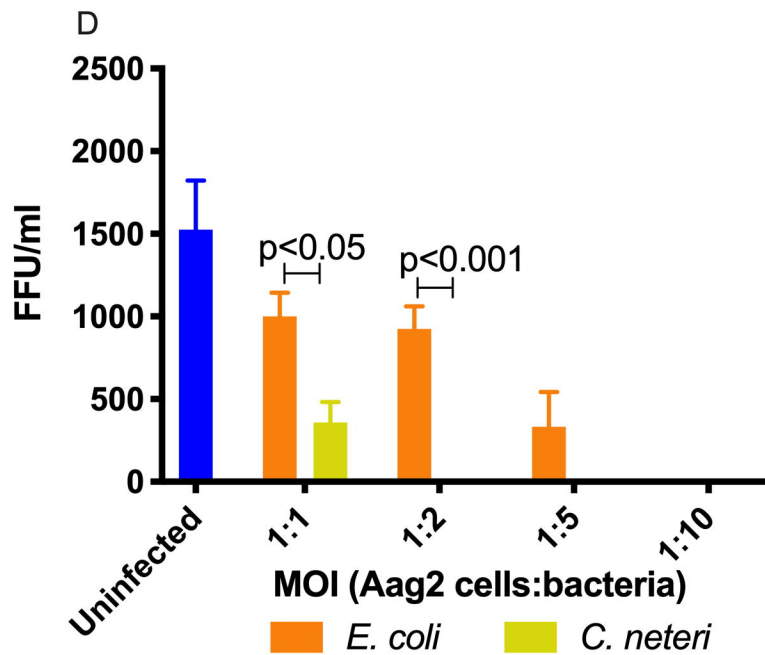

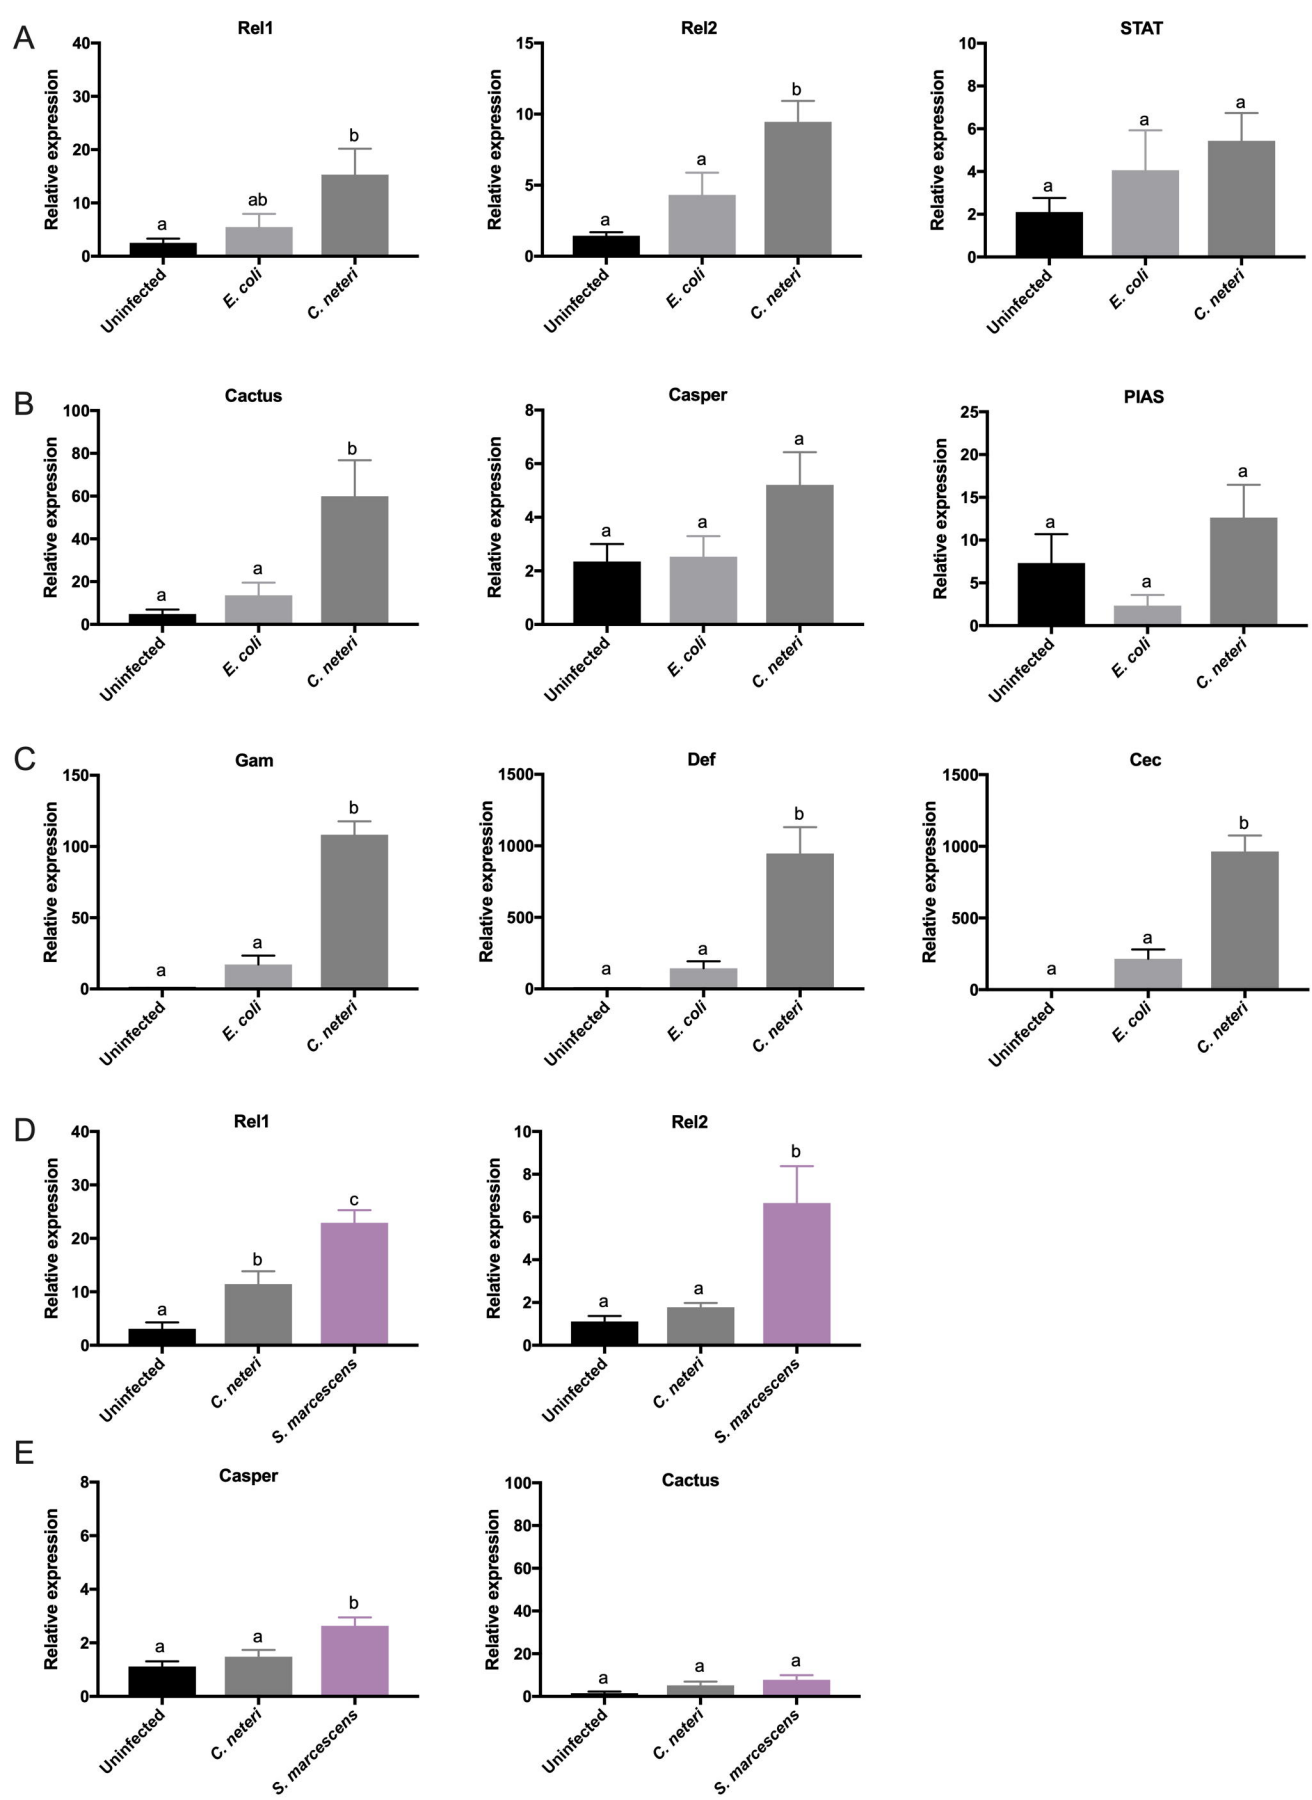



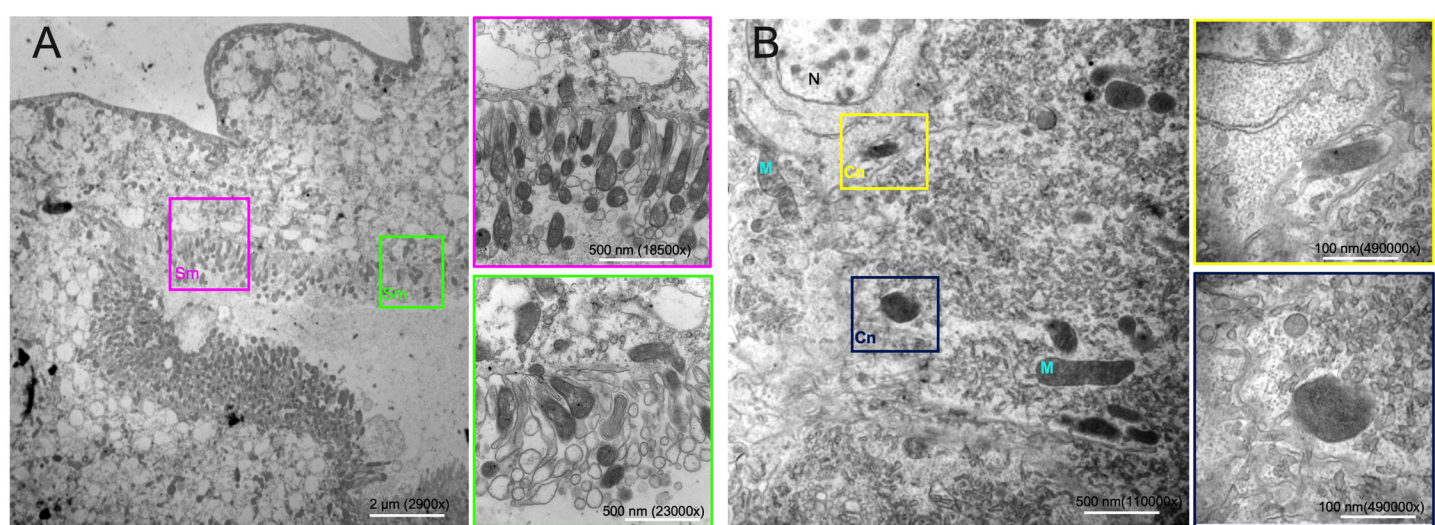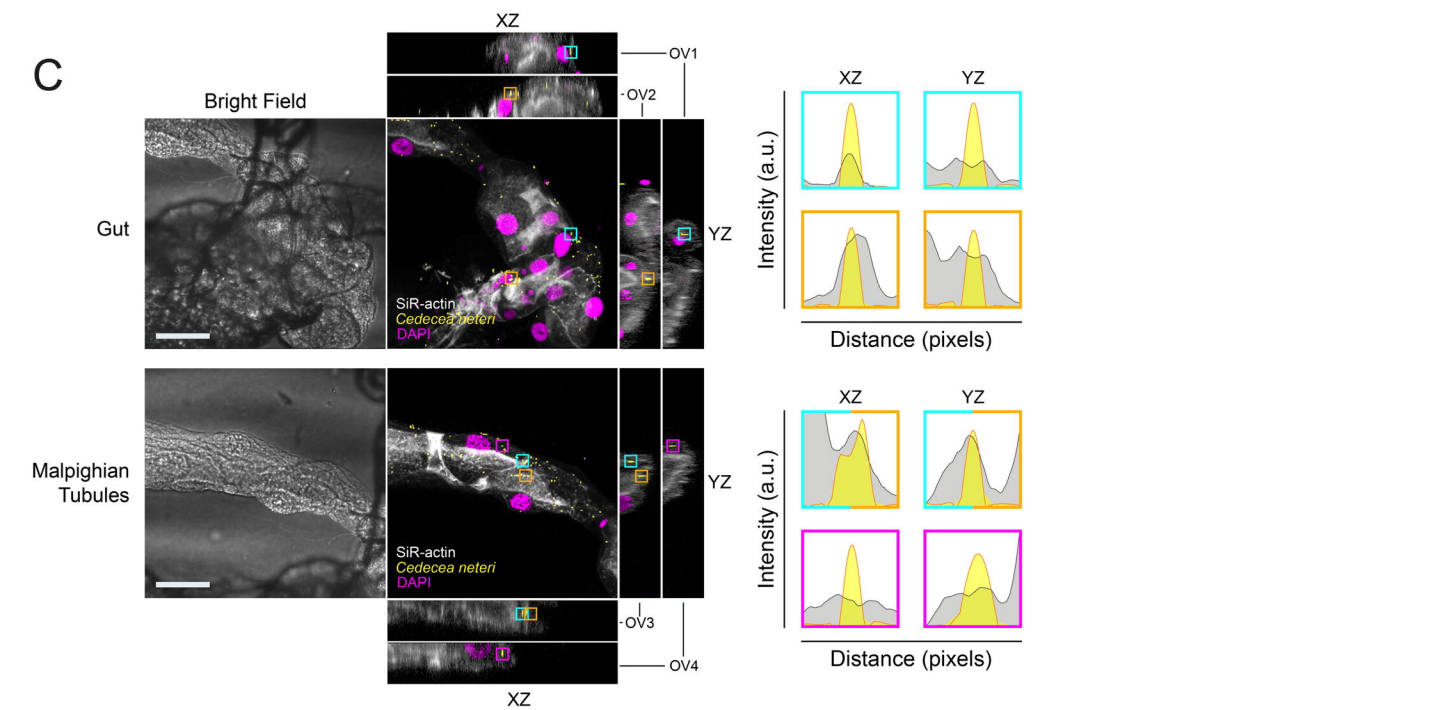

Source: https://www.biorxiv.org/content/10.1101/866897v2.full.pdf
